# Supplementary material for: Synthesis of functionalized γ-lactones via a three-component cascade reaction catalyzed by consecutive N-heterocyclic carbene systems
Source: Royal Society of Chemistry journal article supplement (doi:10.1039/c5ra01254f), 2015-01-01

# Synthesis of functionalized $\gamma$ -lactones via a three-component cascade reaction catalyzed by consecutive N-heterocyclic carbene systems

Qian Zhao,<sup>†a</sup> Bo Han,<sup>†b</sup> Biao Wang,<sup>a</sup> Hai-jun Leng,<sup>b</sup> Cheng Peng<sup>\*a,b</sup> and Wei Huang<sup>\*a</sup>

<sup>a</sup> Ministry of Education Key Laboratory of Standardization of Chinese Medicine, School of Pharmacy, Chengdu University of Traditional Chinese Medicine, Chengdu 611137, P. R. China. E-mail: [huangwei@cdutcm.edu.cn](mailto:huangwei@cdutcm.edu.cn)

<sup>b</sup> State Key Laboratory Breeding Base of Systematic Research, Development and Utilization of Chinese Medicine Resources, Chengdu University of Traditional Chinese Medicine, Chengdu 611137, P. R. China. E-mail: [pengcheng@cdutcm.edu.cn](mailto:pengcheng@cdutcm.edu.cn)

<sup>†</sup> These authors contributed equally to this work.

## Supporting Information

### Table of Contents

1. General methods
2. General procedure for the synthesis of  $\gamma$ -lactone 4
3. Crystal data of 4a
4. NMR spectra

## 1. General methods

NMR data was obtained for  $^1\text{H}$  at 400 MHz, and for  $^{13}\text{C}$  at 100 MHz. Chemical shifts were reported in ppm from tetramethylsilane with the solvent resonance as the internal standard in  $\text{CDCl}_3$  solution. ESI HRMS was performed on a Waters SYNAPT G2. Column chromatography was performed on silica gel (200-300 mesh) using an eluent of ethyl acetate and petroleum ether. TLC was performed on glass-backed silica plates; products were visualized using UV light and  $\text{I}_2$ . Melting points were determined on a Mel-Temp apparatus and were not corrected. All chemicals were used from Adamas-beta without purification unless otherwise noted.

## 2. General procedure for the synthesis of $\gamma$ -lactone **4**

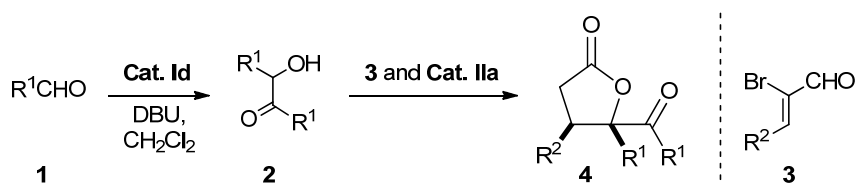

The reaction was carried out with precatalyst **Id** (0.1 mmol), DBU (0.3 mmol) and aldehyde **1** (1.6 mmol) in  $\text{CH}_2\text{Cl}_2$  (2.0 mL) at 50 °C for a specified reaction time until the sufficient acyloin **2** was generated (monitored by TLC), after which precatalyst **IIa** (0.1 mmol) and 2-bromoenal **3** (0.4 mmol) were added in-situ. The reaction mixture was stirred until the reaction completed. Then the reaction mixture was concentrated and the residue was purified by flash chromatography on silica gel (petroleum ether/ethyl acetate = 10:1) to give  $\gamma$ -lactone **4**.

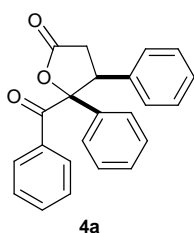

**4a** was obtained as a white solid in 64% yield for two steps after flash chromatography. The dr value was calculated to be 90:10 by  $^1\text{H}$  NMR analysis of the crude reaction mixture. m.p. 139-140 °C;  $^1\text{H}$  NMR (400 MHz,  $\text{CDCl}_3$ ):  $\delta$  = 7.90 (d,  $J$  = 7.6 Hz, 2H), 7.46-7.43 (m, 1H), 7.32-7.26 (m, 2H), 7.11-7.07 (m, 8H), 6.94 (s, 2H), 4.88 (t,  $J$  = 5.6 Hz, 1H), 3.03 (dd,  $J_1$  = 18.0 Hz,  $J_2$  = 8.8 Hz, 1H), 2.88 (dd,  $J_1$  = 18.0 Hz,  $J_2$  = 3.2 Hz, 1H) ppm;  $^{13}\text{C}$  NMR (100 MHz,  $\text{CDCl}_3$ ):  $\delta$  = 195.29, 175.24, 137.31, 135.33, 133.59, 133.42, 130.95, 128.79, 128.45, 128.27, 128.19, 128.07, 127.26, 124.68,

95.07, 47.94, 35.53 ppm; ESI HRMS: calcd. For  $C_{23}H_{18}O_3+Na$  365.1154, found 365.1151.

For the minor diastereomer of **4a**,  $^1H$  NMR (400 MHz,  $CDCl_3$ ):  $\delta$  = 7.81 (d,  $J$  = 7.6 Hz, 2H), 7.60 (d,  $J$  = 7.2 Hz, 2H), 7.47-7.40 (m, 4H), 7.30-7.24 (m, 5H), 7.18-7.17 (m, 2H), 4.17 (d,  $J$  = 7.6 Hz, 1H), 2.87 (dd,  $J_1$  = 17.6 Hz,  $J_2$  = 8.0 Hz, 1H), 2.58 (d,  $J$  = 17.2 Hz, 1H) ppm;  $^{13}C$  NMR (100 MHz,  $CDCl_3$ ):  $\delta$  = 197.48, 175.65, 140.13, 138.46, 136.14, 132.84, 129.40, 129.17, 128.97, 128.93, 128.01, 127.57, 127.49, 125.27, 95.85, 53.94, 36.43 ppm; ESI HRMS: calcd. For  $C_{23}H_{18}O_3+Na$  365.1154, found 365.1156.

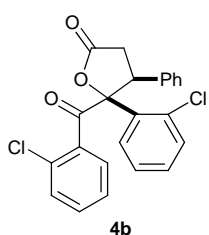

**4b** was obtained as a white solid in 65% yield for two steps after flash chromatography. The dr value was calculated to be 95:5 by  $^1H$  NMR analysis of the crude reaction mixture. m.p. 144-145 °C;  $^1H$  NMR (400 MHz,  $CDCl_3$ ):  $\delta$  = 7.57 (d,  $J$  = 7.2 Hz, 1H), 7.39 (d,  $J$  = 7.6 Hz, 1H), 7.26-7.21 (m, 1H), 7.12-6.93 (m, 10H), 5.05 (d,  $J$  = 8.8 Hz, 1H), 3.62 (dd,  $J_1$  = 18.0 Hz,  $J_2$  = 9.2 Hz, 1H), 2.71 (d,  $J$  = 18.0 Hz, 1H) ppm;  $^{13}C$  NMR (100 MHz,  $CDCl_3$ ):  $\delta$  = 193.46, 175.25, 139.28, 134.30, 134.02, 133.48, 131.81, 131.11, 130.70, 129.80, 129.70, 129.32, 128.21, 127.93, 127.38, 126.77, 125.48, 94.29, 45.32, 37.97 ppm; ESI HRMS: calcd. For  $C_{23}H_{16}Cl_2O_3+Na$  433.0374, found 433.0370.

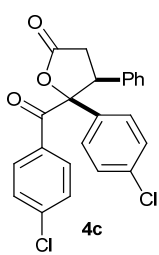

**4c** was obtained as a white solid in 68% yield for two steps after flash chromatography. The dr value was calculated to be 88:15 by  $^1H$  NMR analysis of the crude reaction mixture. m.p. 114-115 °C;  $^1H$  NMR (400 MHz,  $CDCl_3$ ):  $\delta$  = 7.84 (d,  $J$  = 8.4 Hz, 2H), 7.31-7.29 (m, 2H), 7.11-7.09 (m, 5H), 6.98-6.93 (m, 4H), 4.85 (dd,  $J_1$  = 8.0 Hz,  $J_2$  = 5.6 Hz, 1H), 3.03 (dd,  $J_1$  = 18.0 Hz,  $J_2$  = 8.4 Hz, 1H), 2.87 (dd,  $J_1$  = 18.0 Hz,  $J_2$  = 5.6 Hz, 1H) ppm;  $^{13}C$  NMR (100 MHz,  $CDCl_3$ ):  $\delta$  = 193.84, 174.65, 140.29, 136.89, 134.49, 133.76, 132.27, 131.61, 128.79, 128.76, 128.63, 128.35, 127.62, 126.07, 94.48, 47.75, 35.38 ppm; ESI HRMS: calcd. For  $C_{23}H_{16}Cl_2O_3+Na$  433.0374, found 433.0371.

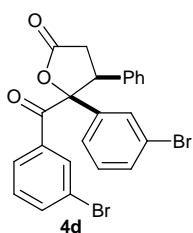

**4d** was obtained as a white solid in 65% yield for two steps after flash chromatography. The dr value was calculated to be 92:8 by  $^1H$  NMR analysis of the crude reaction mixture. m.p. 126-127 °C;  $^1H$  NMR (400 MHz,  $CDCl_3$ ):  $\delta$  = 8.08 (s, 1H), 7.79 (d,  $J$  = 8.0 Hz, 1H), 7.60-7.56 (m, 1H), 7.25-7.23 (m, 1H),

7.20-7.16 (m, 2H), 7.11 (m, 3H), 7.00-6.91 (m, 4H), 4.84 (t,  $J = 6.8$  Hz, 1H), 3.03 (dd,  $J_1 = 18.0$  Hz,  $J_2 = 8.4$  Hz, 1H), 2.88 (dd,  $J_1 = 18.0$  Hz,  $J_2 = 5.2$  Hz, 1H) ppm;  $^{13}\text{C}$  NMR (100 MHz,  $\text{CDCl}_3$ ):  $\delta = 193.60, 174.52, 137.25, 136.73, 136.55, 135.04, 133.47, 131.57, 130.07, 129.94, 129.60, 128.59, 128.32, 127.78, 127.70, 123.26, 122.92, 122.68, 94.20, 47.94, 35.24$  ppm; ESI HRMS: calcd. For  $\text{C}_{23}\text{H}_{16}\text{Br}_2\text{O}_3 + \text{Na}$  520.9364, found 520.9367.

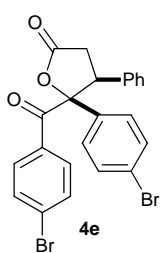

**4e** was obtained as a white solid in 70% yield for two steps after flash chromatography. The dr value was calculated to be 85:15 by  $^1\text{H}$  NMR analysis of the crude reaction mixture. m.p. 143-144  $^\circ\text{C}$ ;  $^1\text{H}$  NMR (400 MHz,  $\text{CDCl}_3$ ):  $\delta = 7.76$  (d,  $J = 8.4$  Hz, 2H), 7.47 (d,  $J = 8.0$  Hz, 2H), 7.26-7.24 (m, 3H), 7.11 (s, 3H), 6.91-6.89 (m, 3H), 4.84 (t,  $J = 6.4$  Hz, 1H), 3.03 (dd,  $J_1 = 18.0$  Hz,  $J_2 = 8.4$  Hz, 1H), 2.87 (dd,  $J_1 = 18.0$  Hz,  $J_2 = 5.2$  Hz, 1H) ppm;  $^{13}\text{C}$  NMR (100 MHz,  $\text{CDCl}_3$ ):  $\delta = 193.85, 174.58, 136.83, 134.26, 132.31, 132.01, 131.78, 131.74, 129.19, 128.62, 128.36, 127.64, 126.34, 122.68, 94.50, 47.70, 35.37$  ppm; ESI HRMS: calcd. For  $\text{C}_{23}\text{H}_{16}\text{Br}_2\text{O}_3 + \text{Na}$  520.9364, found 520.9366.

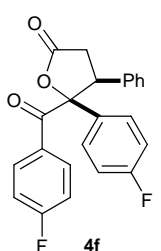

**4f** was obtained as a white solid in 65% yield for two steps after flash chromatography. The dr value was calculated to be 87:13 by  $^1\text{H}$  NMR analysis of the crude reaction mixture. m.p. 127-128  $^\circ\text{C}$ ;  $^1\text{H}$  NMR (400 MHz,  $\text{CDCl}_3$ ):  $\delta = 7.95$  (s, 2H), 7.10 (br s, 3H), 7.01-7.00 (m, 4H), 6.92 (m, 2H), 6.83-6.79 (m, 2H), 4.86 (t,  $J = 6.0$  Hz, 1H), 3.03 (dd,  $J_1 = 18.0$  Hz,  $J_2 = 8.4$  Hz, 1H), 2.88 (dd,  $J_1 = 18.0$  Hz,  $J_2 = 4.8$  Hz, 1H) ppm;  $^{13}\text{C}$  NMR (100 MHz,  $\text{CDCl}_3$ ):  $\delta = 193.59, 174.82, 165.77$  (d,  $J_{\text{CF}} = 255$  Hz), 162.41 (d,  $J_{\text{CF}} = 247$  Hz), 137.10, 133.78 (d,  $J_{\text{CF}} = 9$  Hz), 131.14 (d,  $J_{\text{CF}} = 4$  Hz), 129.72 (d,  $J_{\text{CF}} = 3$  Hz), 128.65, 128.27, 127.50, 126.54 (d,  $J_{\text{CF}} = 9$  Hz), 115.72 (d,  $J_{\text{CF}} = 3$  Hz), 115.50 (d,  $J_{\text{CF}} = 2$  Hz), 94.57, 47.81, 35.38 ppm; ESI HRMS: calcd. For  $\text{C}_{23}\text{H}_{16}\text{F}_2\text{O}_3 + \text{Na}$  401.0965, found 401.0968.

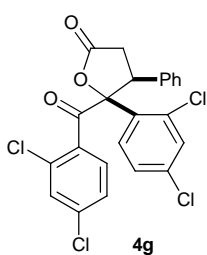

**4g** was obtained as a white solid in 70% yield for two steps after flash chromatography. The dr value was calculated to be 92:8 by  $^1\text{H}$  NMR analysis of the crude reaction mixture. m.p. 148-149  $^\circ\text{C}$ ;  $^1\text{H}$  NMR (400 MHz,  $\text{CDCl}_3$ ):  $\delta = 7.49$  (d,  $J = 8.4$  Hz, 1H), 7.43 (s, 1H), 7.19-7.17 (m, 1H), 7.07-6.97 (m, 8H), 4.98 (d,  $J = 8.8$  Hz, 1H), 3.61 (dd,  $J_1 = 18.0$  Hz,  $J_2 = 9.2$  Hz, 1H), 2.82 (d,  $J = 18.4$  Hz, 1H) ppm;  $^{13}\text{C}$  NMR (100 MHz,  $\text{CDCl}_3$ ):  $\delta = 192.09, 174.73, 138.86, 137.85, 135.08, 134.85,$

132.83, 132.17, 131.36, 131.33, 130.30, 129.68, 128.73, 128.46, 127.75, 127.25, 126.03, 93.71, 45.39, 37.76 ppm; ESI HRMS: calcd. For  $C_{23}H_{14}Cl_4O_3+Na$  500.9595, found 500.9597.

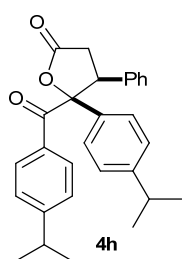

**4h** was obtained as a white solid in 54% yield for two steps after flash chromatography. The dr value was calculated to be 86:14 by  $^1H$  NMR analysis of the crude reaction mixture. m.p. 131-132 °C;  $^1H$  NMR (400 MHz,  $CDCl_3$ ):  $\delta$  = 7.86 (d,  $J$  = 8.4 Hz, 2H), 7.17-7.15 (m, 2H), 7.04-7.03 (m, 3H), 6.96-6.88 (m, 6H), 4.82 (dd,  $J_1$  = 8.4 Hz,  $J_2$  = 6.4 Hz, 1H), 2.99 (dd,  $J_1$  = 18.0 Hz,  $J_2$  = 8.8 Hz, 1H),

2.90-2.83 (m, 2H), 2.77-2.71 (m, 1H), 1.20 (d,  $J$  = 2.0 Hz, 3H), 1.18 (d,  $J$  = 1.6 Hz, 3H), 1.11 (d,  $J$  = 3.2 Hz, 3H), 1.10 (d,  $J$  = 3.2 Hz, 3H) ppm;  $^{13}C$  NMR (100 MHz,  $CDCl_3$ ):  $\delta$  = 195.06, 175.47, 154.91, 148.99, 137.40, 132.71, 131.44, 131.32, 128.85, 127.86, 127.06, 126.39, 124.57, 95.20, 48.04, 35.40, 34.24, 33.60, 23.78, 23.77, 23.53, 23.47 ppm; ESI HRMS: calcd. For  $C_{29}H_{30}O_3+Na$  449.2093, found 449.2090.

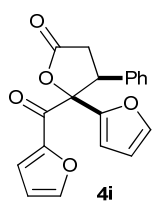

**4i** was obtained as a white solid in 72% yield for two steps after flash chromatography. The dr value was calculated to be 80:20 by  $^1H$  NMR analysis of the crude reaction mixture. m.p. 126-127 °C;  $^1H$  NMR (400 MHz,  $CDCl_3$ ):  $\delta$  = 7.65 (s, 1H), 7.32 (br s, 1H), 7.18 (br s, 4H), 7.09 (br s, 2H), 6.49 (s, 1H), 6.15 (d,  $J$  = 8.8 Hz, 2H), 4.70 (t,  $J$  = 8.4 Hz, 1H), 3.11-2.97 (m, 2H) ppm;  $^{13}C$  NMR (100 MHz,  $CDCl_3$ ):  $\delta$  = 181.03, 174.27, 149.14,

148.16, 147.95, 143.20, 136.25, 128.29, 128.24, 127.66, 123.13, 112.56, 110.58, 109.38, 89.67, 46.69, 34.42 ppm; ESI HRMS: calcd. For  $C_{19}H_{14}O_5+Na$  345.0739, found 345.0743.

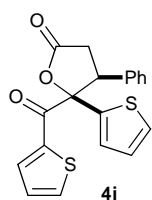

**4j** was obtained as a white solid in 71% yield for two steps after flash chromatography. The dr value was calculated to be 75:25 by  $^1H$  NMR analysis of the crude reaction mixture. m.p. 90-91 °C;  $^1H$  NMR (400 MHz,  $CDCl_3$ ):  $\delta$  = 7.98 (d,  $J$  = 3.6 Hz, 1H), 7.66 (d,  $J$  = 4.8 Hz, 1H), 7.16-7.05 (m, 7H), 6.75-6.72 (m, 1H), 6.60-6.59 (m, 1H),

4.75 (t,  $J$  = 7.2 Hz, 1H), 3.06-2.93 (m, 2H) ppm;  $^{13}C$  NMR (100 MHz,  $CDCl_3$ ):  $\delta$  = 187.83, 174.24, 139.34, 138.10, 136.77, 136.63, 135.76, 128.70, 128.61, 128.18, 127.67, 127.10, 126.17, 126.09, 93.47, 48.18, 34.96 ppm; ESI HRMS: calcd. For  $C_{19}H_{14}O_3S_2+Na$  377.0282, found 377.0280.

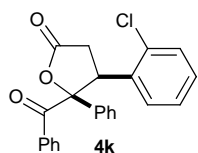

**4k** was obtained as a white solid in 60% yield for two steps after flash chromatography. The dr value was calculated to be 92:8 by  $^1\text{H}$  NMR analysis of the crude reaction mixture. m.p. 101-103 °C;  $^1\text{H}$  NMR (400 MHz,  $\text{CDCl}_3$ ):  $\delta$  = 7.93 (d,  $J$  = 7.6 Hz, 2H), 7.48-7.44 (m, 1H), 7.34-7.26 (m, 5H), 7.12-7.03 (m, 5H), 7.00-6.97 (m, 1H), 5.72 (d,  $J$  = 8.8 Hz, 1H), 3.15 (dd,  $J_1$  = 18.0 Hz,  $J_2$  = 9.2 Hz, 1H), 2.75 (d,  $J$  = 18.4 Hz, 1H) ppm;  $^{13}\text{C}$  NMR (100 MHz,  $\text{CDCl}_3$ ):  $\delta$  = 194.80, 175.42, 136.79, 134.83, 134.20, 133.48, 133.29, 131.04, 129.50, 128.57, 128.54, 128.31, 128.24, 128.20, 126.92, 124.67, 95.86, 43.24, 36.73 ppm; ESI HRMS: calcd. For  $\text{C}_{23}\text{H}_{17}\text{ClO}_3 + \text{Na}$  399.0764, found 399.0760.

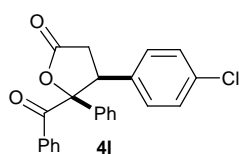

**4l** was obtained as a white solid in 61% yield for two steps after flash chromatography. The dr value was calculated to be 86:14 by  $^1\text{H}$  NMR analysis of the crude reaction mixture. m.p. 123-124 °C;  $^1\text{H}$  NMR (400 MHz,  $\text{CDCl}_3$ ):  $\delta$

= 7.89 (d,  $J$  = 8.0 Hz, 2H), 7.47-7.43 (m, 1H), 7.32-7.29 (m, 2H), 7.15 (br s, 3H), 7.06-7.04 (m, 4H), 6.86 (d,  $J$  = 7.6 Hz, 2H), 4.85 (t,  $J$  = 7.6 Hz, 1H), 3.01 (dd,  $J_1$  = 18.0 Hz,  $J_2$  = 8.4 Hz, 1H), 2.82 (dd,  $J_1$  = 18.0 Hz,  $J_2$  = 6.4 Hz, 1H) ppm;  $^{13}\text{C}$  NMR (100 MHz,  $\text{CDCl}_3$ ):  $\delta$  = 194.03, 173.71, 134.67, 134.01, 132.50, 132.41, 132.18, 129.91, 129.10, 127.65, 127.46, 127.26, 127.17, 123.58, 93.64, 46.37, 34.28 ppm; ESI HRMS: calcd. For  $\text{C}_{23}\text{H}_{17}\text{ClO}_3 + \text{Na}$  399.0764, found 399.0767.

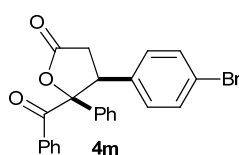

**4m** was obtained as a white solid in 66% yield for two steps after flash chromatography. The dr value was calculated to be 85:15 by  $^1\text{H}$  NMR analysis of the crude reaction mixture. m.p. 149-150 °C;  $^1\text{H}$  NMR (400 MHz,  $\text{CDCl}_3$ ):  $\delta$

= 7.89 (d,  $J$  = 8.0 Hz, 2H), 7.46-7.43 (m, 1H), 7.32-7.28 (m, 2H), 7.21-7.15 (m, 5H), 7.04 (br s, 2H), 6.80 (d,  $J$  = 8.0 Hz, 2H), 4.83 (t,  $J$  = 7.6 Hz, 1H), 3.01 (dd,  $J_1$  = 18.0 Hz,  $J_2$  = 8.8 Hz, 1H), 2.81 (dd,  $J_1$  = 18.0 Hz,  $J_2$  = 6.4 Hz, 1H) ppm;  $^{13}\text{C}$  NMR (100 MHz,  $\text{CDCl}_3$ ):  $\delta$  = 195.04, 174.70, 136.23, 135.02, 133.53, 133.44, 131.16, 130.94, 130.49, 128.70, 128.52, 128.30, 124.62, 121.37, 94.59, 47.48, 35.26 ppm; ESI HRMS: calcd. For  $\text{C}_{123}\text{H}_{17}\text{BrO}_3 + \text{Na}$  443.0259, found 443.0262.

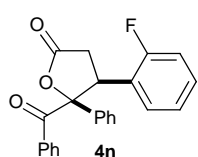

**4n** was obtained as a white solid in 57% yield for two steps after flash chromatography. The dr value was calculated to be 90:10 by  $^1\text{H}$  NMR analysis of the crude reaction mixture. m.p. 112-114 °C;  $^1\text{H}$  NMR (400 MHz,  $\text{CDCl}_3$ ):  $\delta$  =

7.93 (d,  $J$  = 7.6 Hz, 2H), 7.47-7.44 (m, 1H), 7.33-7.30 (m, 2H), 7.23-7.21 (m, 2H), 7.13-7.00 (m,

5H), 6.93-6.90 (m, 1H), 6.75-6.70 (m, 1H), 5.28 (dd,  $J_1 = 9.2$  Hz,  $J_2 = 1.6$  Hz, 1H), 3.09 (dd,  $J_1 = 18.0$  Hz,  $J_2 = 8.8$  Hz, 1H), 2.85 (dd,  $J_1 = 18.0$  Hz,  $J_2 = 2.0$  Hz, 1H) ppm;  $^{13}\text{C}$  NMR (100 MHz,  $\text{CDCl}_3$ ):  $\delta = 194.87, 175.19, 160.44$  (d,  $J_{\text{CF}} = 245$  Hz), 135.29, 133.47, 133.34, 131.04, 129.88 (d,  $J_{\text{CF}} = 4$  Hz), 129.24 (d,  $J_{\text{CF}} = 9$  Hz), 128.38, 128.29, 128.21, 125.80 (d,  $J_{\text{CF}} = 13$  Hz), 124.38, 123.97 (d,  $J_{\text{CF}} = 4$  Hz), 115.38 (d,  $J_{\text{CF}} = 23$  Hz), 95.34, 42.16, 35.45 ppm; ESI HRMS: calcd. For  $\text{C}_{23}\text{H}_{17}\text{FO}_3 + \text{Na}$  383.1059, found 383.1063.

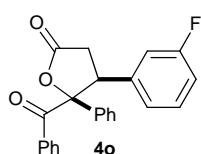

**4o** was obtained as a white solid in 61% yield for two steps after flash chromatography. The dr value was calculated to be 85:15 by  $^1\text{H}$  NMR analysis of the crude reaction mixture. m.p. 129-130 °C;  $^1\text{H}$  NMR (400 MHz,  $\text{CDCl}_3$ ):  $\delta =$

7.90 (d,  $J = 8.0$  Hz, 2H), 7.47-7.43 (m, 1H), 7.33-7.29 (m, 2H), 7.15-7.14 (m, 3H), 7.07-7.02 (m, 3H), 6.79-6.73 (m, 2H), 6.65 (d,  $J = 10.0$  Hz, 1H), 4.88 (t,  $J = 7.2$  Hz, 1H), 3.03 (dd,  $J_1 = 18.0$  Hz,  $J_2 = 8.8$  Hz, 1H), 2.86 (dd,  $J_1 = 18.0$  Hz,  $J_2 = 6.0$  Hz, 1H) ppm;  $^{13}\text{C}$  NMR (100 MHz,  $\text{CDCl}_3$ ):  $\delta = 194.96, 174.70, 162.36$  (d,  $J_{\text{CF}} = 244$  Hz), 139.85 (d,  $J_{\text{CF}} = 7$  Hz), 135.05, 133.53, 133.42, 130.97, 129.52, 128.62, 128.45, 128.30, 125.17, 124.57, 115.93 (d,  $J_{\text{CF}} = 21$  Hz), 114.25 (d,  $J_{\text{CF}} = 21$  Hz), 94.76, 47.59, 35.27 ppm; ESI HRMS: calcd. For  $\text{C}_{23}\text{H}_{17}\text{FO}_3 + \text{Na}$  383.1059, found 383.1056.

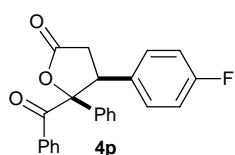

**4p** was obtained as a white solid in 68% yield for two steps after flash chromatography. The dr value was calculated to be 82:18 by  $^1\text{H}$  NMR analysis of the crude reaction mixture. m.p. 120-122 °C;  $^1\text{H}$  NMR (400 MHz,  $\text{CDCl}_3$ ):  $\delta =$

7.89 (d,  $J = 8.0$  Hz, 2H), 7.47-7.43 (m, 1H), 7.33-7.29 (m, 2H), 7.15-7.14 (m, 3H), 7.04-7.03 (m, 2H), 6.91-6.88 (m, 2H), 6.79-6.75 (m, 2H), 4.88-4.85 (m, 1H), 3.02 (dd,  $J_1 = 17.6$  Hz,  $J_2 = 8.4$  Hz, 1H), 2.83 (dd,  $J_1 = 18.0$  Hz,  $J_2 = 6.4$  Hz, 1H) ppm;  $^{13}\text{C}$  NMR (100 MHz,  $\text{CDCl}_3$ ):  $\delta = 195.16, 174.92, 161.85$  (d,  $J_{\text{CF}} = 245$  Hz), 135.17, 133.52, 133.46, 132.93 (d,  $J_{\text{CF}} = 3$  Hz), 130.95, 130.37 (d,  $J_{\text{CF}} = 8$  Hz), 128.63, 128.40, 128.30, 124.60, 114.96 (d,  $J_{\text{CF}} = 21$  Hz), 94.77, 47.25, 35.43; ESI HRMS: calcd. For  $\text{C}_{23}\text{H}_{17}\text{FO}_3 + \text{Na}$  383.1059, found 383.1060.

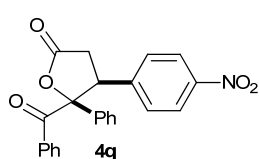

**4q** was obtained as a white solid in 63% yield for two steps after flash chromatography. The dr value was calculated to be 84:16 by  $^1\text{H}$  NMR analysis of the crude reaction mixture. m.p. 158-160 °C;  $^1\text{H}$  NMR (400 MHz,  $\text{CDCl}_3$ ):  $\delta =$

7.94 (d,  $J = 8.8$  Hz, 2H), 7.90 (d,  $J = 7.6$  Hz, 2H), 7.49-7.46 (m, 1H), 7.35-7.31 (m, 2H),

7.16-7.11 (m, 5H), 7.04-7.03 (m, 2H), 5.02-4.99 (m, 1H), 3.09 (dd,  $J_1 = 18.0$  Hz,  $J_2 = 8.4$  Hz, 1H), 2.89 (dd,  $J_1 = 18.0$  Hz,  $J_2 = 6.4$  Hz, 1H) ppm;  $^{13}\text{C}$  NMR (100 MHz,  $\text{CDCl}_3$ ):  $\delta = 194.64, 174.08, 146.97, 144.81, 134.69, 133.78, 133.11, 131.00, 129.81, 128.93, 128.87, 128.39, 124.46, 123.16, 94.42, 47.70, 35.10$  ppm; ESI HRMS: calcd. For  $\text{C}_{23}\text{H}_{17}\text{NO}_5 + \text{Na}$  410.1004, found 410.1009.

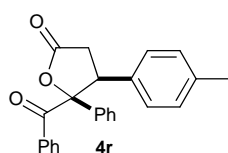

**4r** was obtained as a white solid in 54% yield for two steps after flash chromatography. The dr value was calculated to be 80:20 by  $^1\text{H}$  NMR analysis of the crude reaction mixture. m.p. 99-100 °C;  $^1\text{H}$  NMR (400 MHz,  $\text{CDCl}_3$ ):  $\delta =$

7.90 (d,  $J = 7.6$  Hz, 2H), 7.45-7.41 (m, 1H), 7.31-7.27 (m, 2H), 7.12-7.11 (m, 3H), 7.07-7.06 (m, 2H), 6.87 (d,  $J = 8.0$  Hz, 2H), 6.81 (d,  $J = 8.0$  Hz, 2H), 4.83 (t,  $J = 7.2$  Hz, 1H), 2.99 (dd,  $J_1 = 17.6$  Hz,  $J_2 = 8.4$  Hz, 1H), 2.84 (dd,  $J_1 = 18.0$  Hz,  $J_2 = 6.0$  Hz, 1H), 2.19 (s, 3H) ppm;  $^{13}\text{C}$  NMR (100 MHz,  $\text{CDCl}_3$ ):  $\delta = 195.40, 175.32, 136.91, 135.38, 134.15, 133.78, 133.36, 130.92, 128.74, 128.66, 128.44, 128.25, 128.17, 124.76, 95.06, 47.68, 35.64, 20.96$  ppm; ESI HRMS: calcd. For  $\text{C}_{24}\text{H}_{20}\text{O}_3 + \text{Na}$  379.1310, found 379.1315.

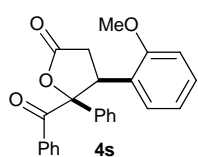

**4s** was obtained as a white solid in 50% yield for two steps after flash chromatography. The dr value was calculated to be 87:13 by  $^1\text{H}$  NMR analysis of the crude reaction mixture. m.p. 89-90 °C;  $^1\text{H}$  NMR (400 MHz,  $\text{CDCl}_3$ ):  $\delta =$

7.94 (d,  $J = 7.6$  Hz, 2H), 7.46-7.42 (m, 1H), 7.32-7.29 (m, 2H), 7.23-7.21 (m, 2H), 7.07-7.00 (m, 5H), 6.74-6.70 (m, 1H), 6.50-6.48 (m, 1H), 5.22 (d,  $J = 9.6$  Hz, 1H), 3.64 (s, 3H), 2.98 (dd,  $J_1 = 18.0$  Hz,  $J_2 = 10.0$  Hz, 1H), 2.83 (dd,  $J_1 = 17.6$  Hz,  $J_2 = 1.2$  Hz, 1H) ppm;  $^{13}\text{C}$  NMR (100 MHz,  $\text{CDCl}_3$ ):  $\delta = 195.59, 176.22, 156.91, 135.81, 133.70, 133.22, 131.03, 130.88, 128.72, 128.19, 127.73, 127.69, 127.09, 124.57, 120.14, 110.11, 95.68, 54.29, 44.66, 35.39$  ppm; ESI HRMS: calcd. For  $\text{C}_{24}\text{H}_{20}\text{O}_4 + \text{Na}$  395.1259, found 395.1263.

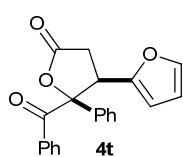

**4t** was obtained as a white solid in 35% yield for two steps after flash chromatography. The dr value was calculated to be 80:20 by  $^1\text{H}$  NMR analysis of the crude reaction mixture. m.p. 102-104 °C;  $^1\text{H}$  NMR (400 MHz,  $\text{CDCl}_3$ ):  $\delta =$

7.91 (d,  $J = 6.4$  Hz, 2H), 7.46 (br s, 1H), 7.32-7.26 (m, 3H), 7.19 (br s, 5H), 7.07 (br s, 1H), 6.08 (s, 1H), 6.01 (s, 1H), 4.94 (br s, 1H), 2.94 (br s, 2H) ppm;  $^{13}\text{C}$  NMR (100 MHz,  $\text{CDCl}_3$ ):  $\delta = 194.64, 174.49, 150.44, 142.14, 135.45, 133.57, 133.24, 131.01, 128.56, 128.34, 128.31, 124.03, 110.17, 108.94,$



94.14, 42.59, 33.26 ppm; ESI HRMS: calcd. For C<sub>21</sub>H<sub>16</sub>O<sub>4</sub>+Na 355.0946, found 355.0943.

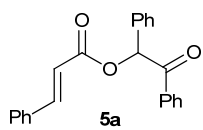

**5a** was obtained as a white solid in 87% yield for two steps after flash chromatography. m.p. 104-106 °C; <sup>1</sup>H NMR (400 MHz, CDCl<sub>3</sub>): δ = 7.98 (d, *J* = 7.2 Hz, 2H), 7.78 (d, *J* = 16.0 Hz, 1H), 7.52 (br s, 5H), 7.43-7.38 (m, 7H), 7.25 (s, 1H), 7.01(s, 1H), 6.60 (d, *J* = 16.0 Hz, 1H) ppm; <sup>13</sup>C NMR (100 MHz, CDCl<sub>3</sub>): δ = 193.83, 166.32, 146.21, 134.71, 134.27, 133.78, 133.52, 130.53, 129.37, 129.19, 128.91, 128.88, 128.78, 128.68, 128.28, 117.14, 77.65 ppm; ESI HRMS: calcd. For C<sub>23</sub>H<sub>18</sub>O<sub>3</sub>+Na 365.1154, found 365.1151.

### 3. Crystal data of 4a

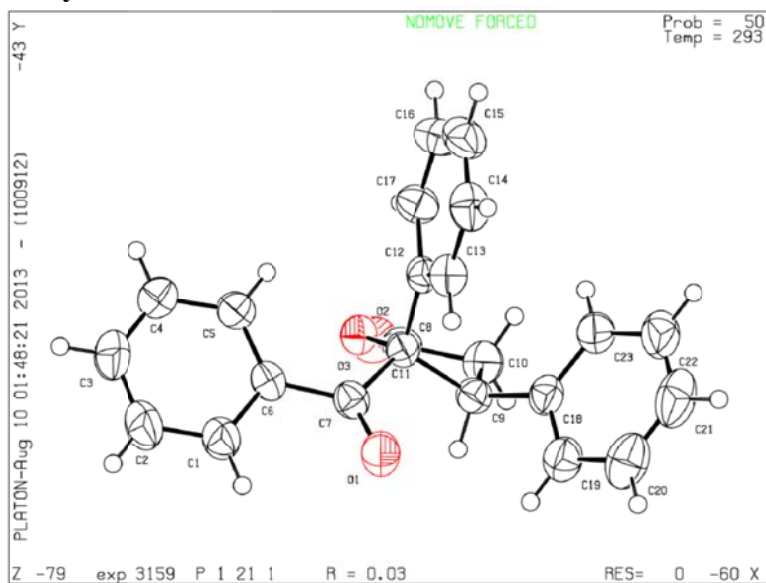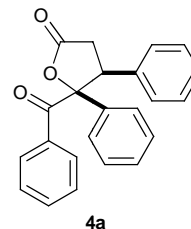

|                                             |                                                   |
|---------------------------------------------|---------------------------------------------------|
| Empirical formula                           | C <sub>23</sub> H <sub>18</sub> O <sub>3</sub>    |
| Formula weight                              | 342.37                                            |
| Temperature/K                               | 293(2)                                            |
| Crystal system                              | monoclinic                                        |
| Space group                                 | P2 <sub>1</sub>                                   |
| a/Å                                         | 6.7969(3)                                         |
| b/Å                                         | 14.0639(6)                                        |
| c/Å                                         | 9.4194(4)                                         |
| α/°                                         | 90.00                                             |
| β/°                                         | 96.811(5)                                         |
| γ/°                                         | 90.00                                             |
| Volume/Å <sup>3</sup>                       | 894.05(7)                                         |
| Z                                           | 2                                                 |
| ρ <sub>calc</sub> /mg/mm <sup>3</sup>       | 1.272                                             |
| m/mm <sup>-1</sup>                          | 0.669                                             |
| F(000)                                      | 360.0                                             |
| Crystal size/mm <sup>3</sup>                | 0.3 × 0.3 × 0.02                                  |
| 2θ range for data collection                | 9.46 to 134.48°                                   |
| Index ranges                                | -5 ≤ h ≤ 8, -16 ≤ k ≤ 14, -11 ≤ l ≤ 11            |
| Reflections collected                       | 5229                                              |
| Independent reflections                     | 2737[R(int) = 0.0221]                             |
| Data/restraints/parameters                  | 2737/1/236                                        |
| Goodness-of-fit on F <sup>2</sup>           | 1.096                                             |
| Final R indexes [I ≥ 2σ(I)]                 | R <sub>1</sub> = 0.0317, wR <sub>2</sub> = 0.0877 |
| Final R indexes [all data]                  | R <sub>1</sub> = 0.0333, wR <sub>2</sub> = 0.0894 |
| Largest diff. peak/hole / e Å <sup>-3</sup> | 0.15/-0.13                                        |

## 4. NMR spectra

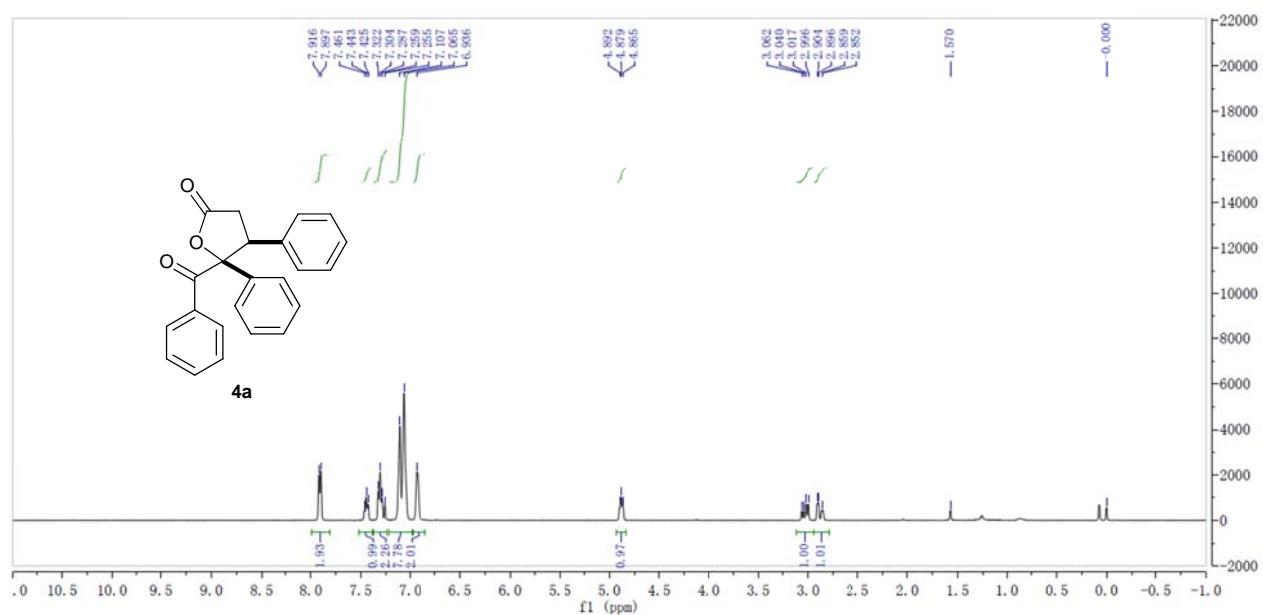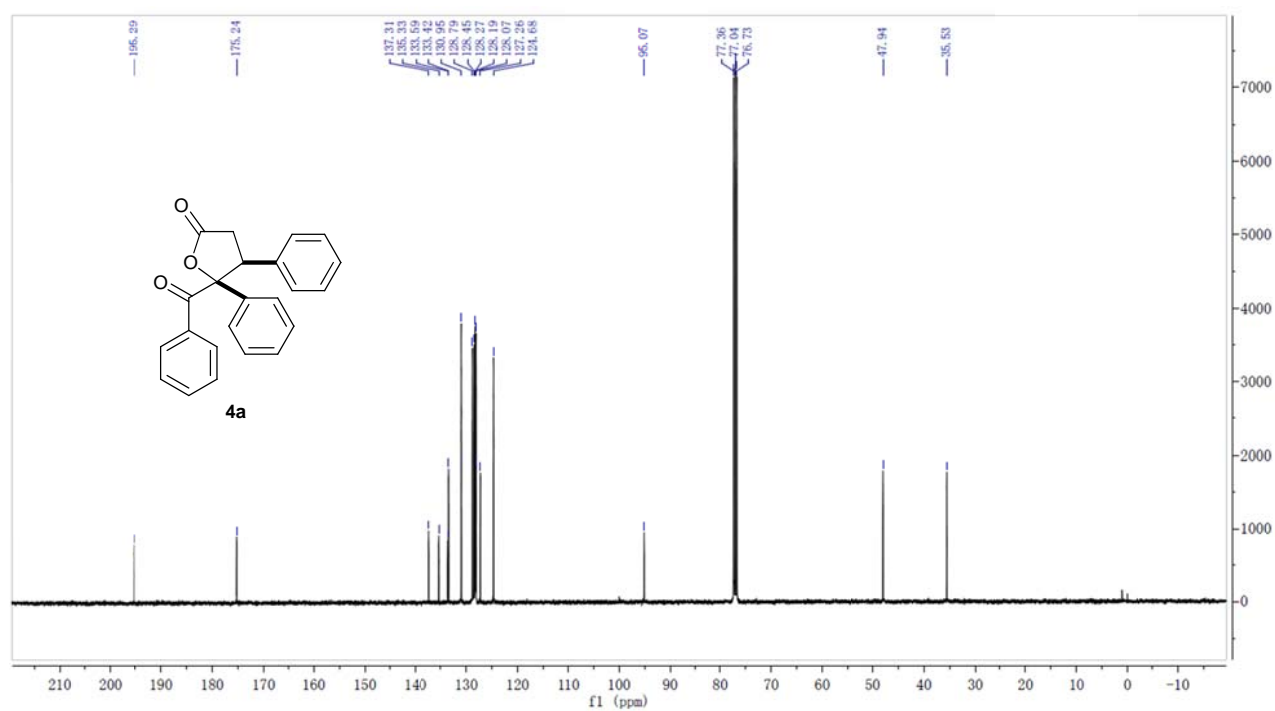

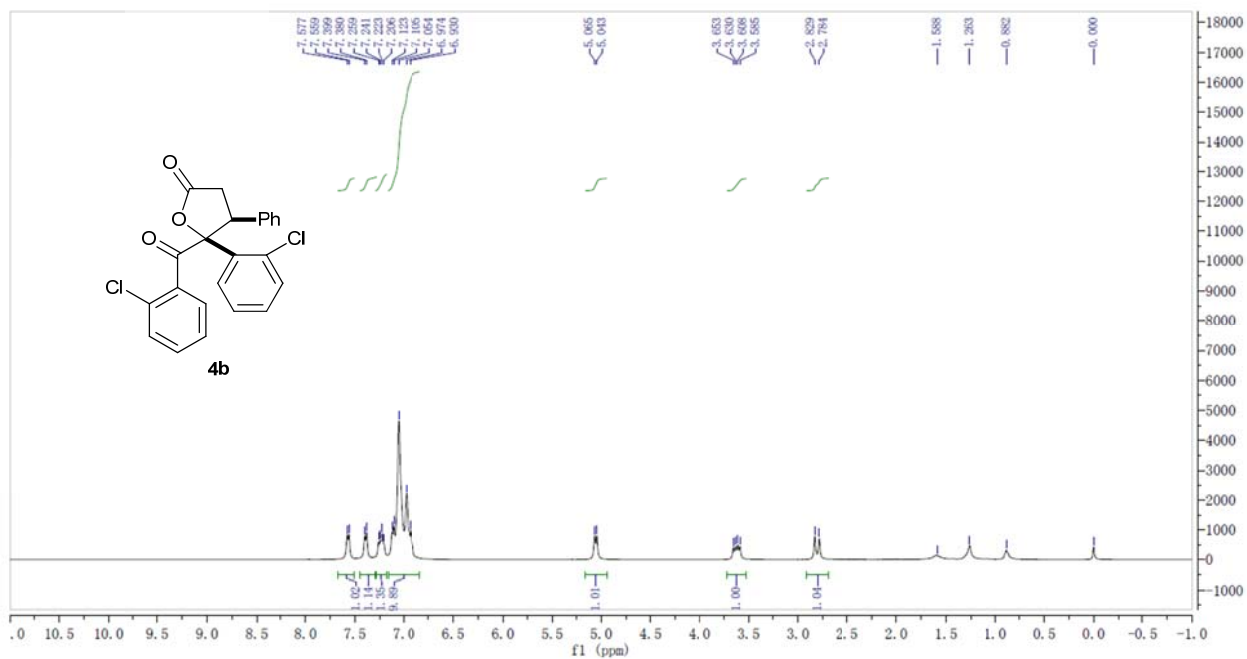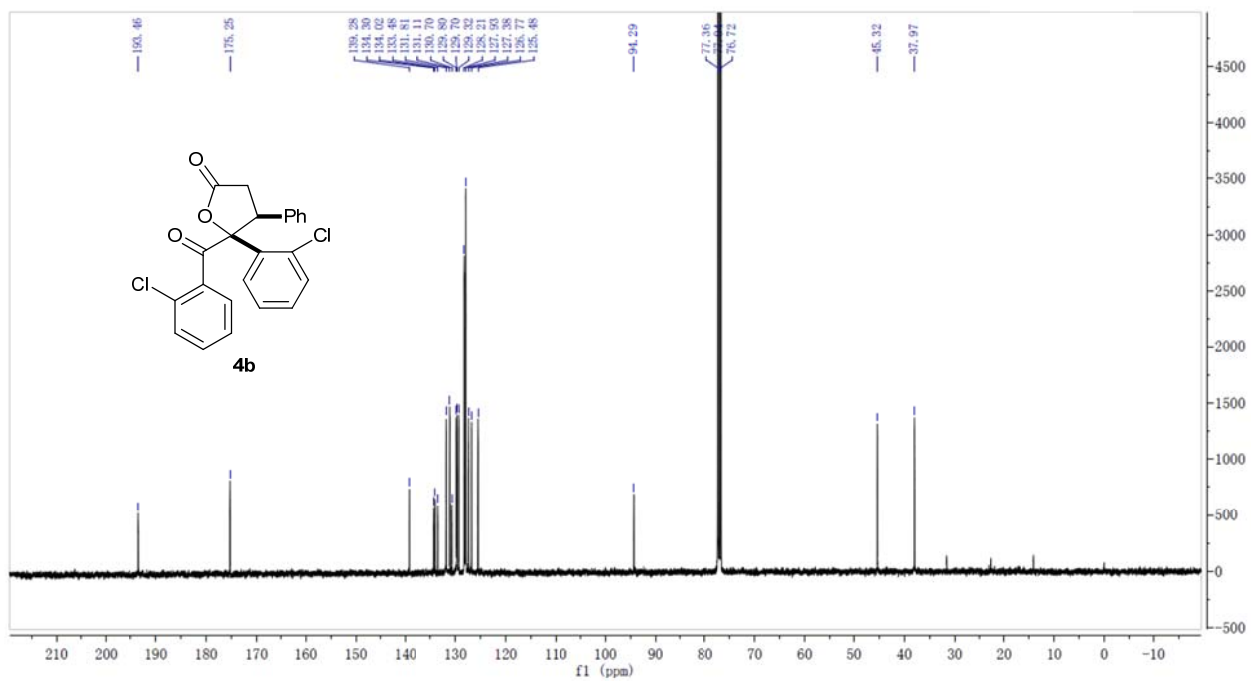

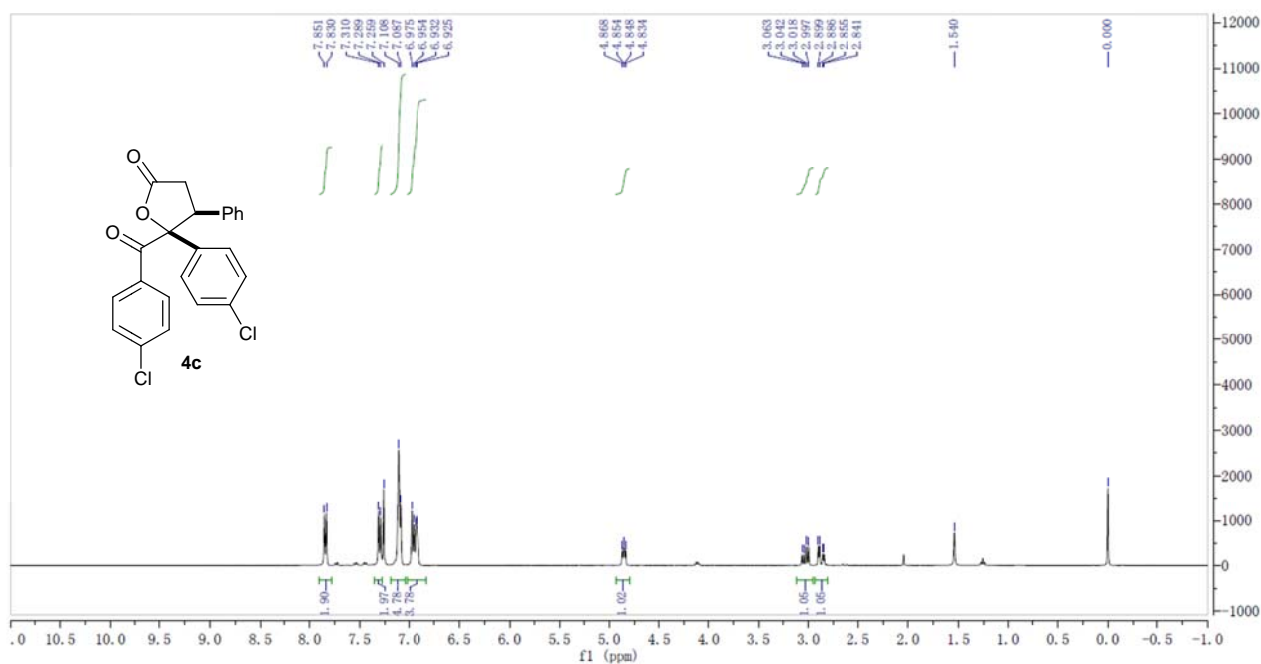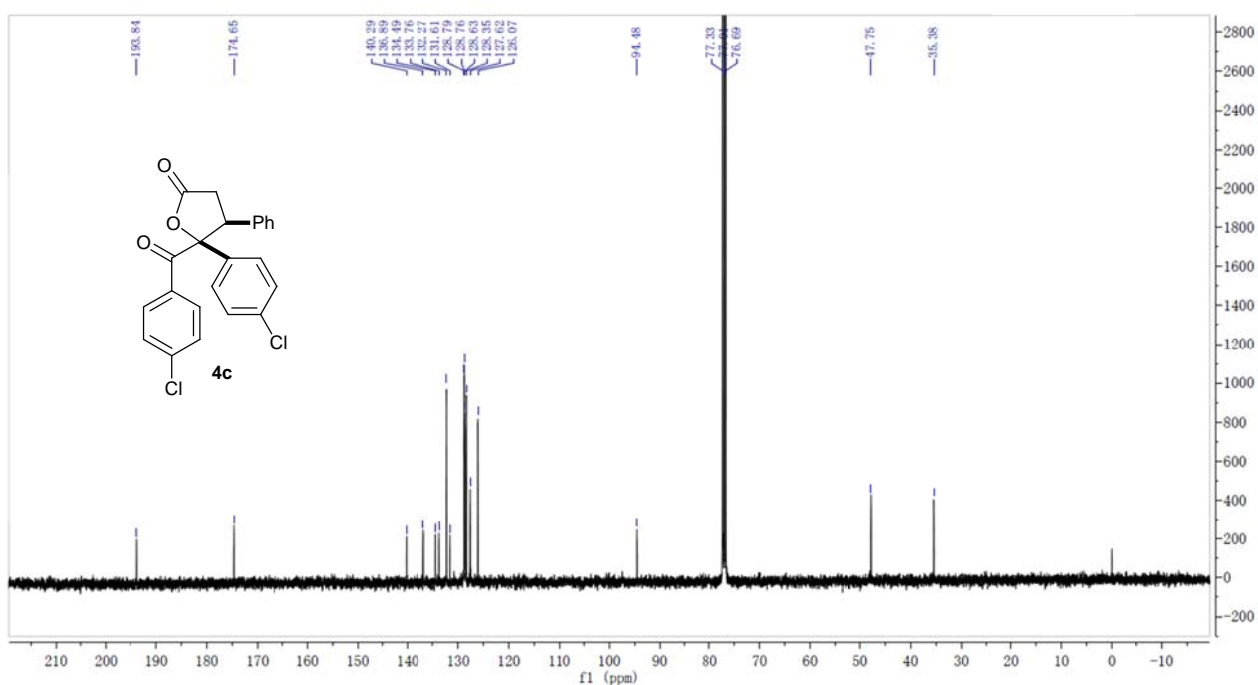

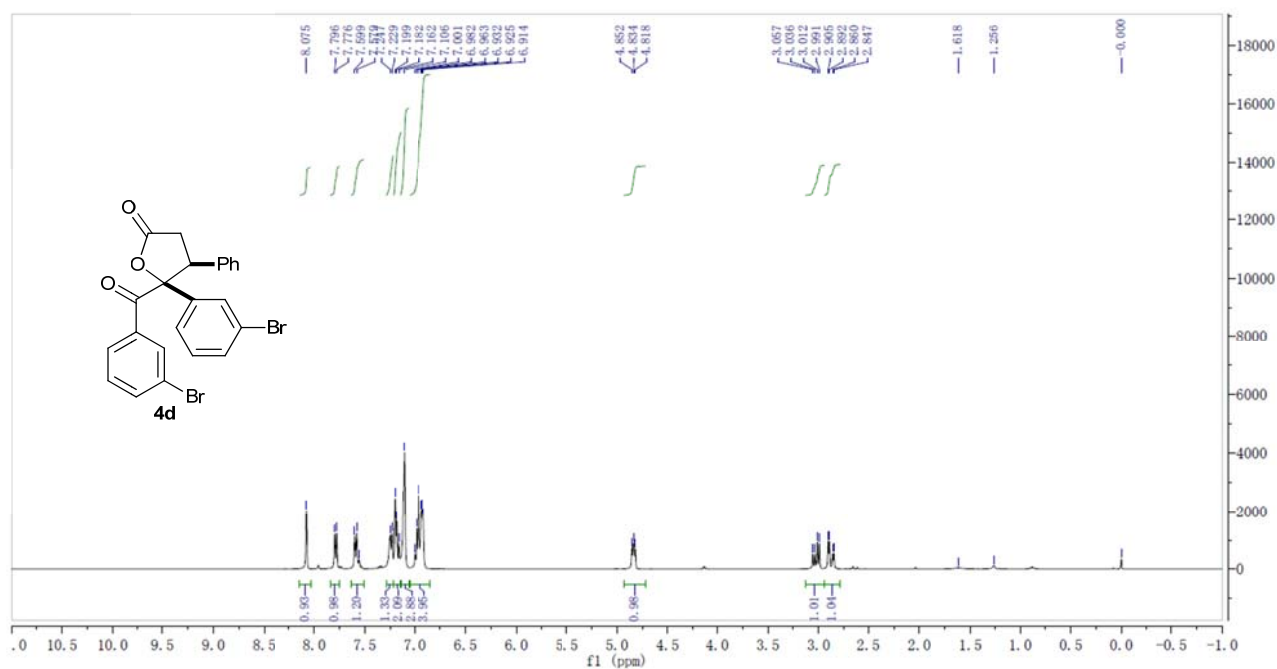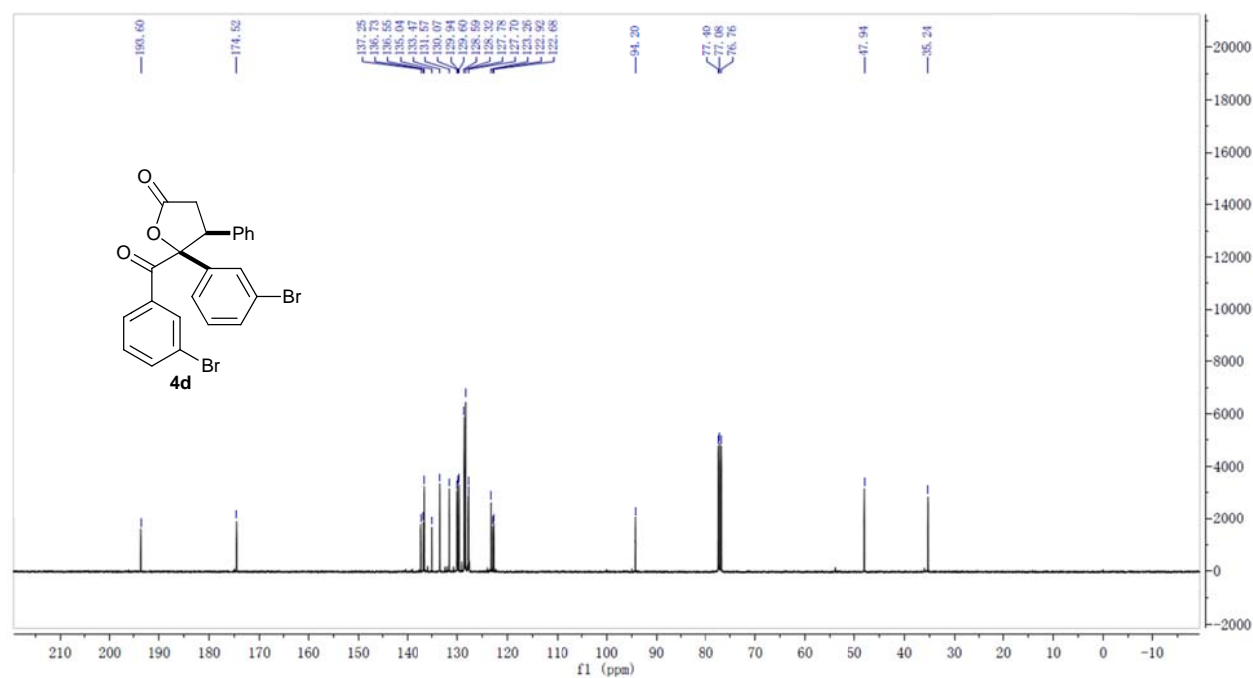

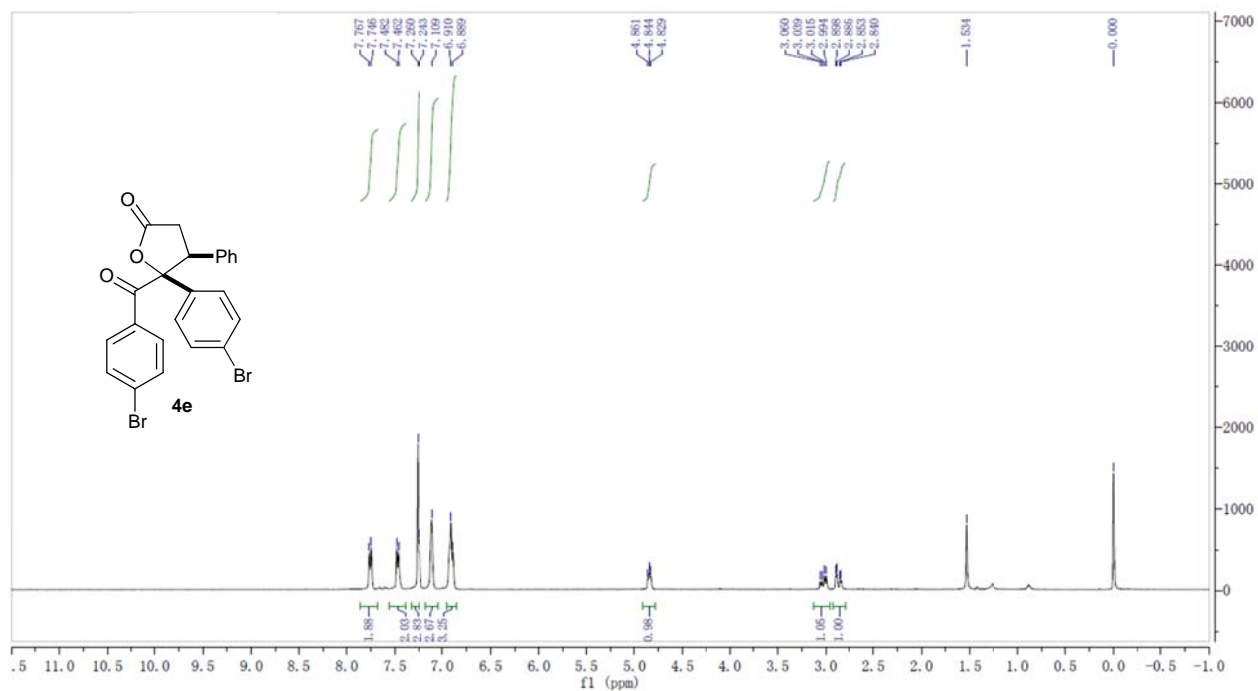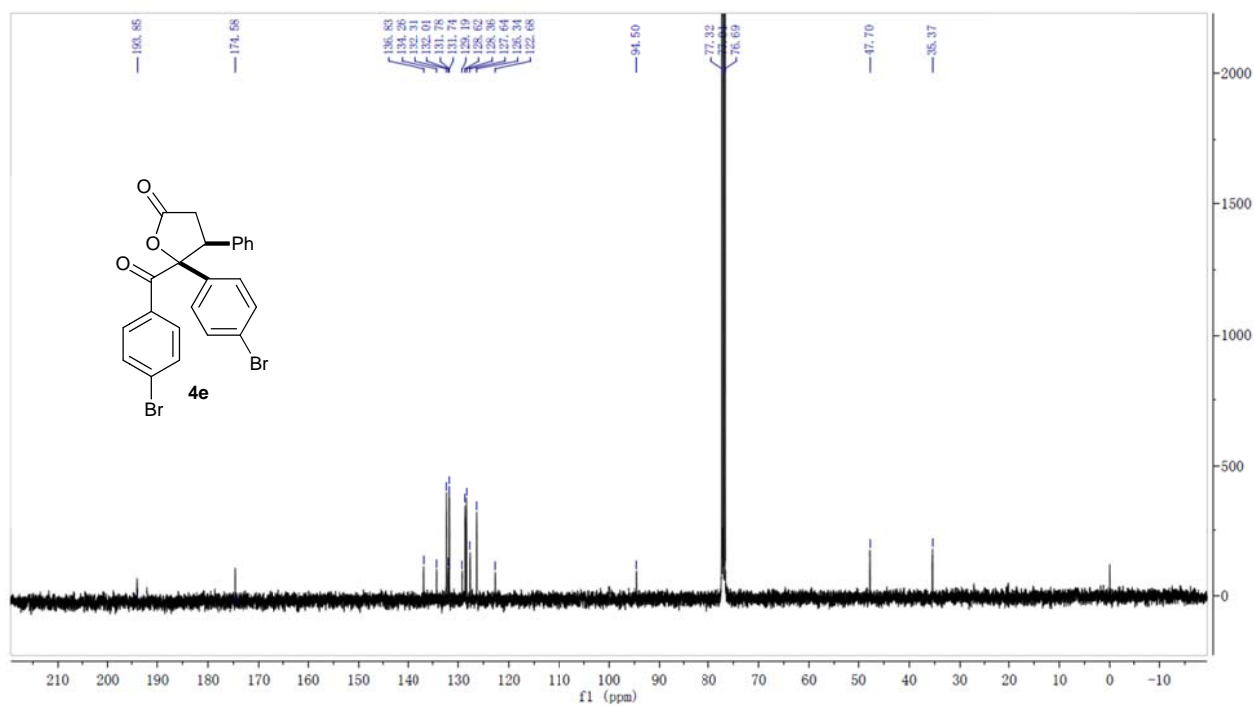

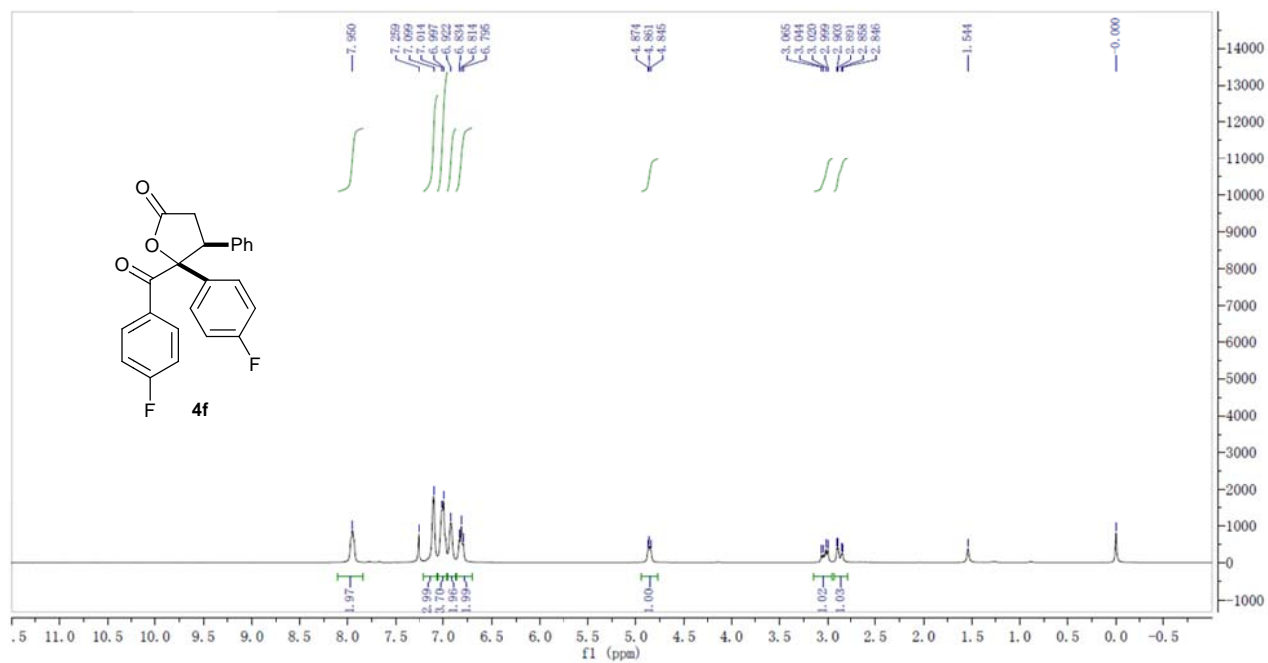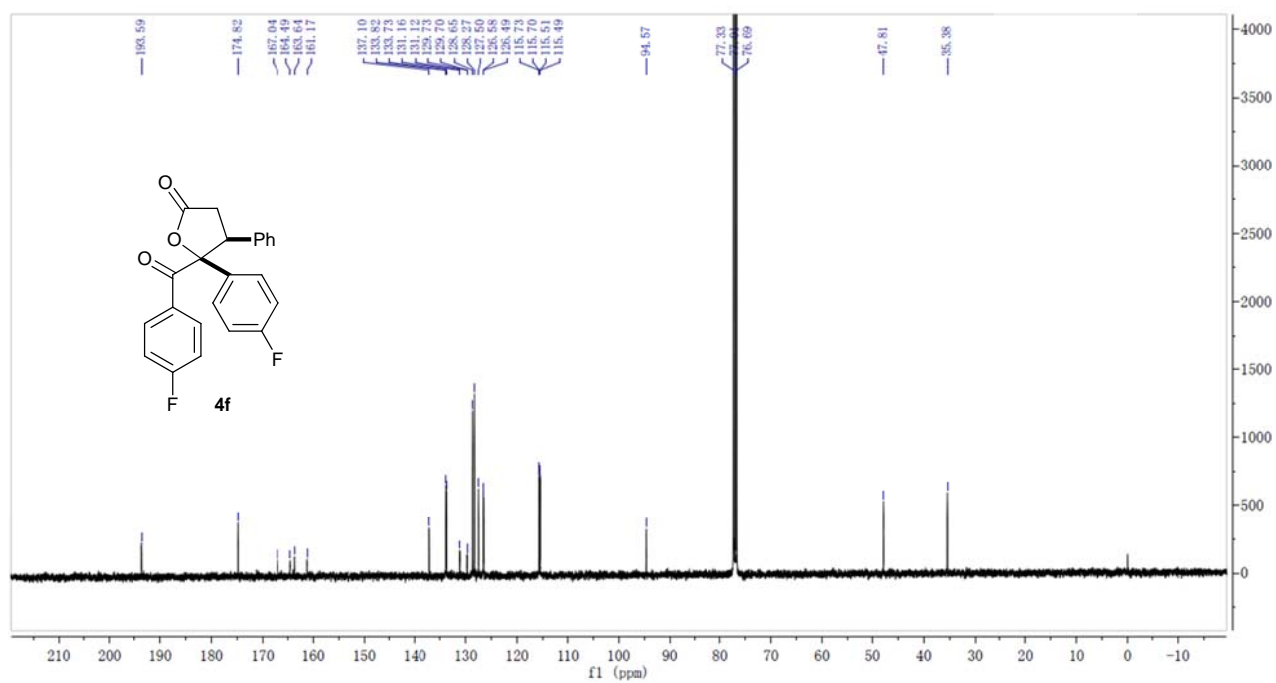



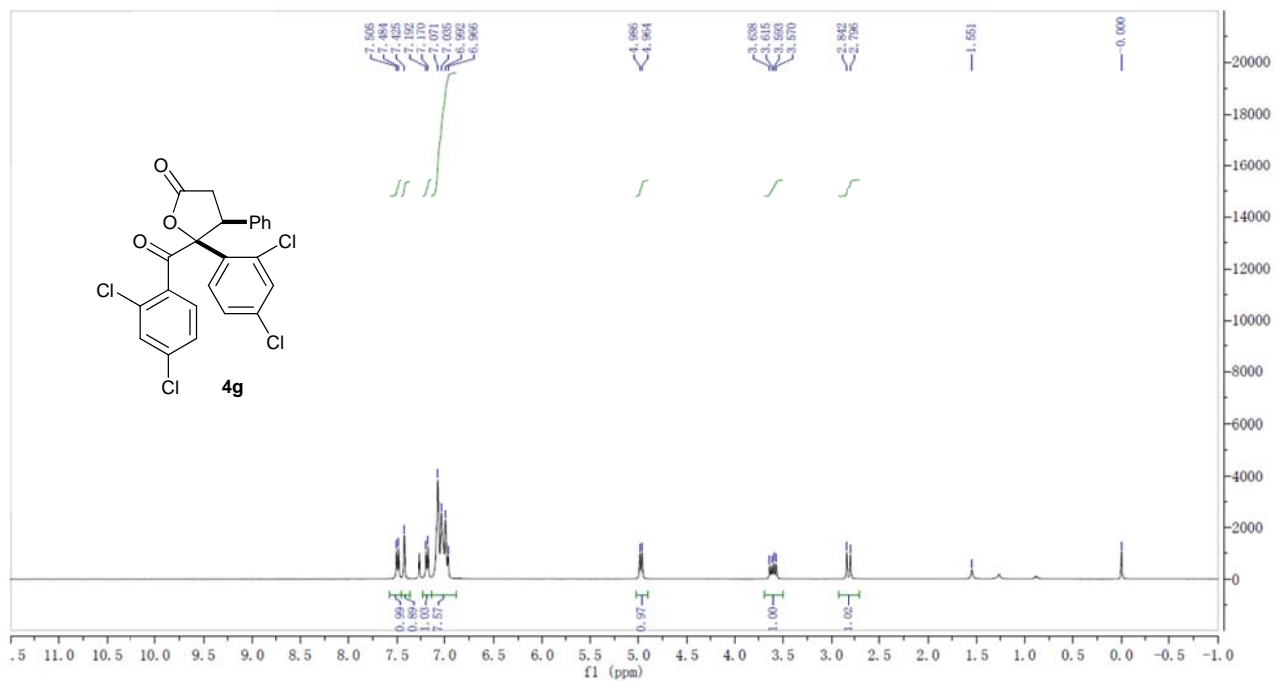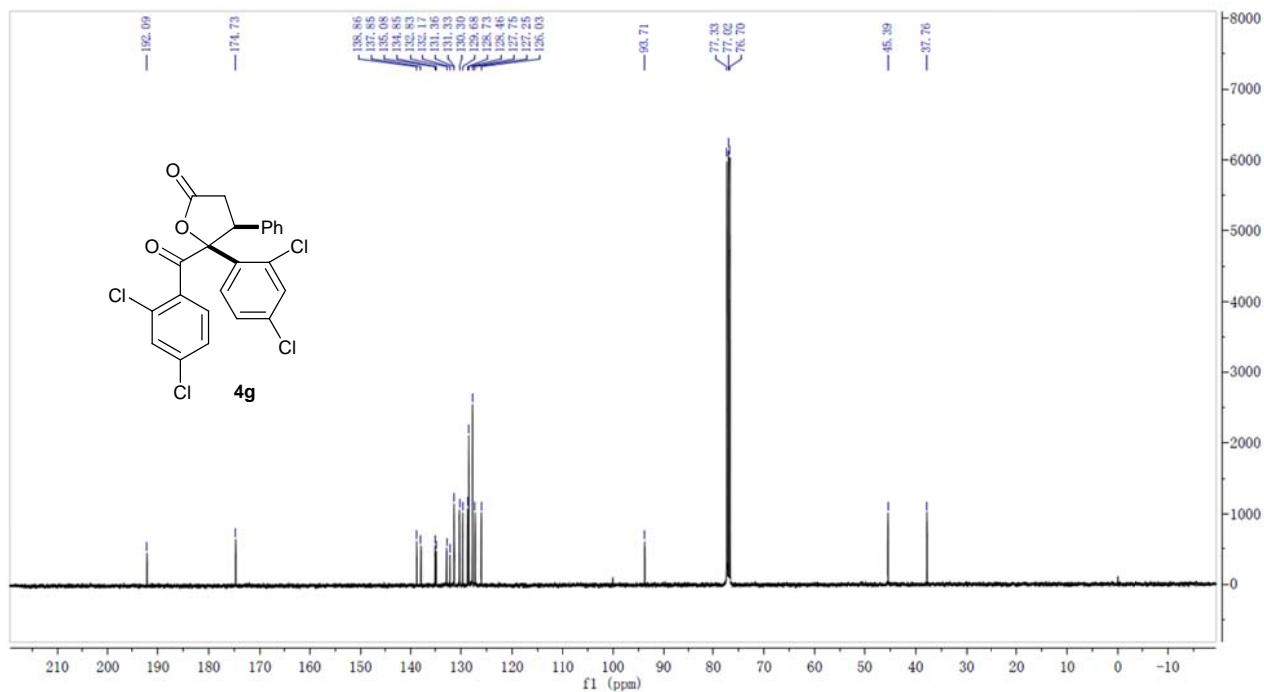

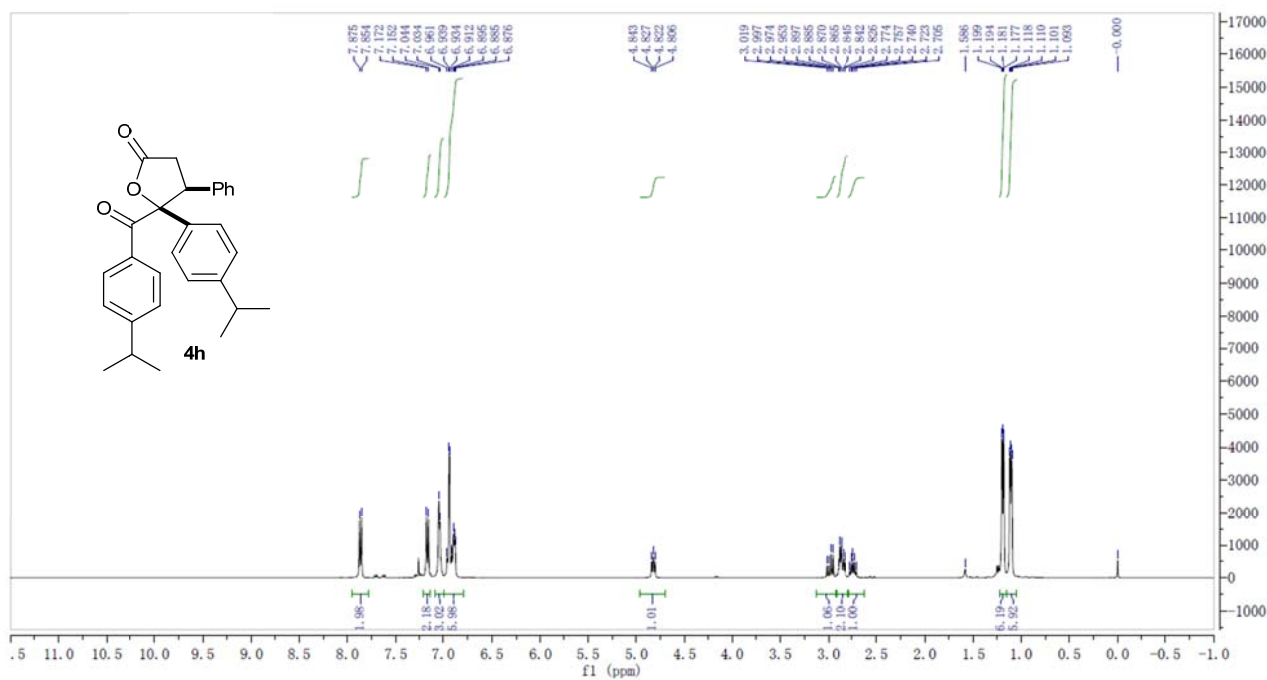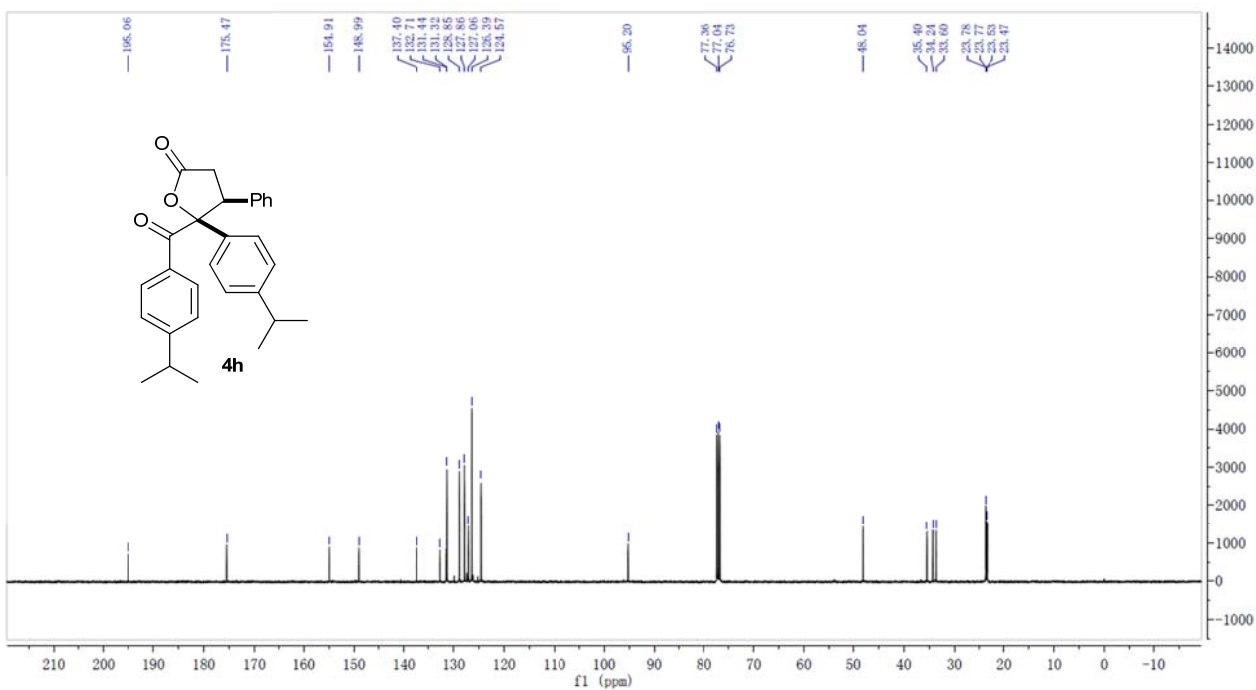

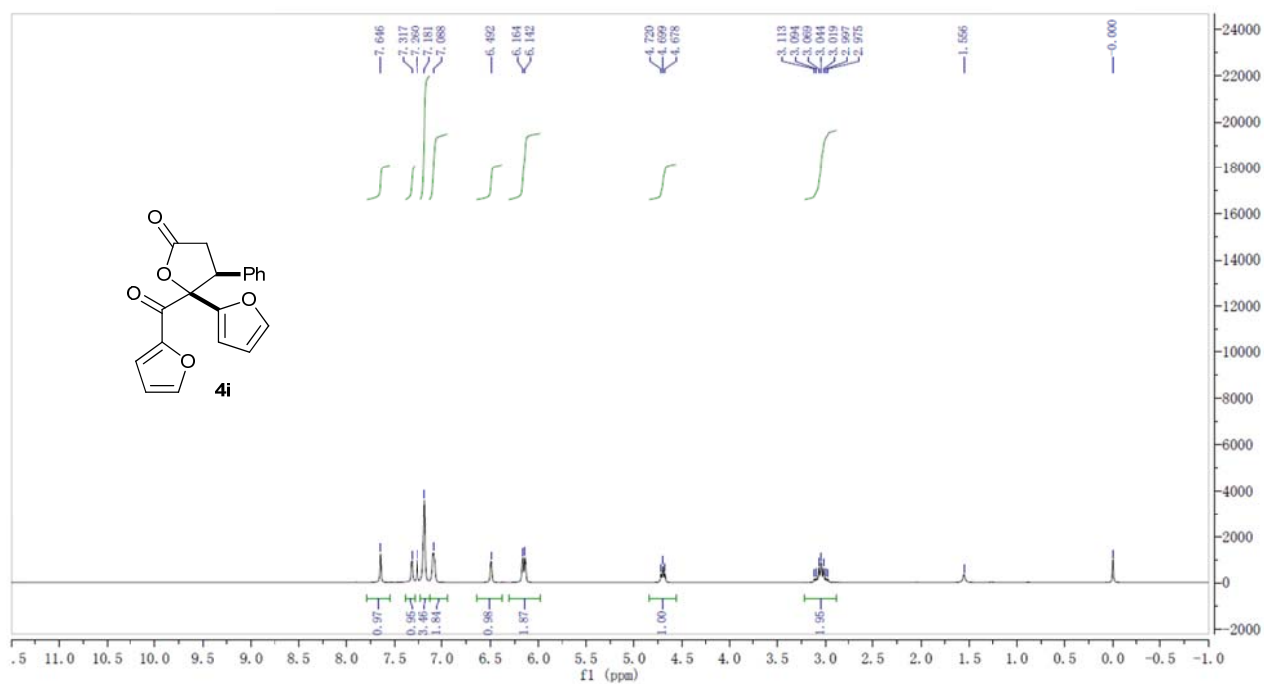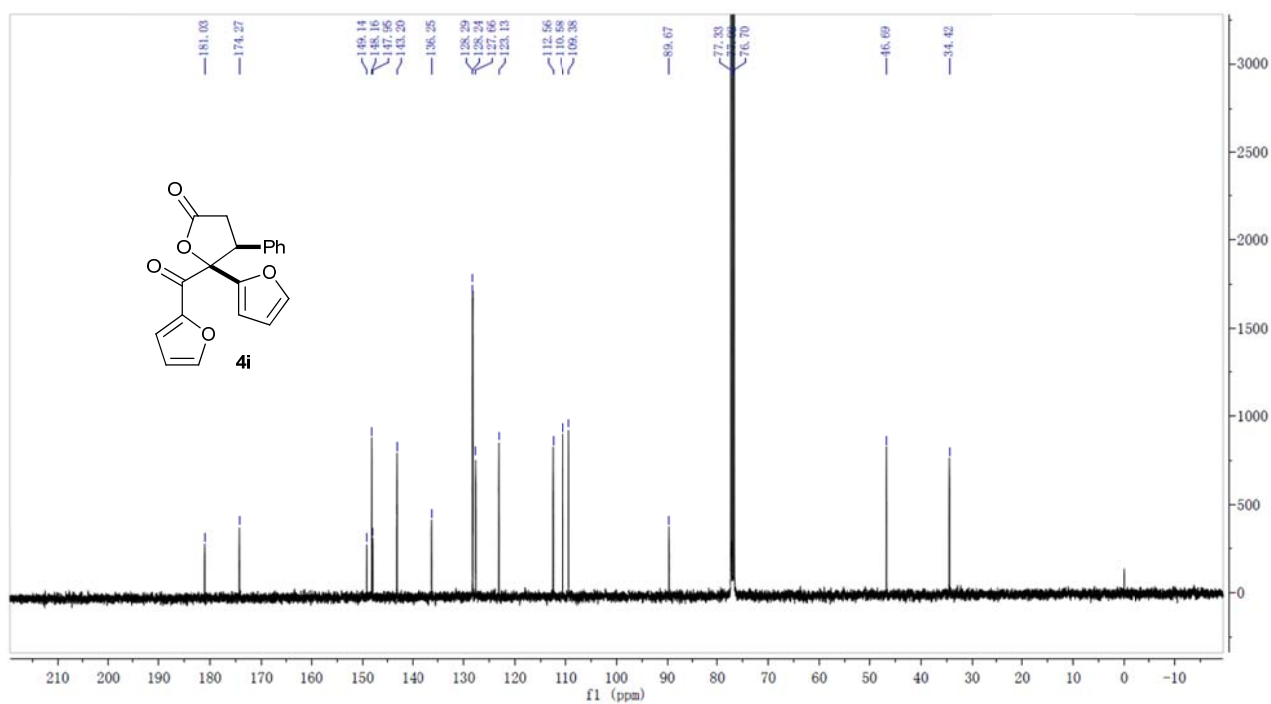

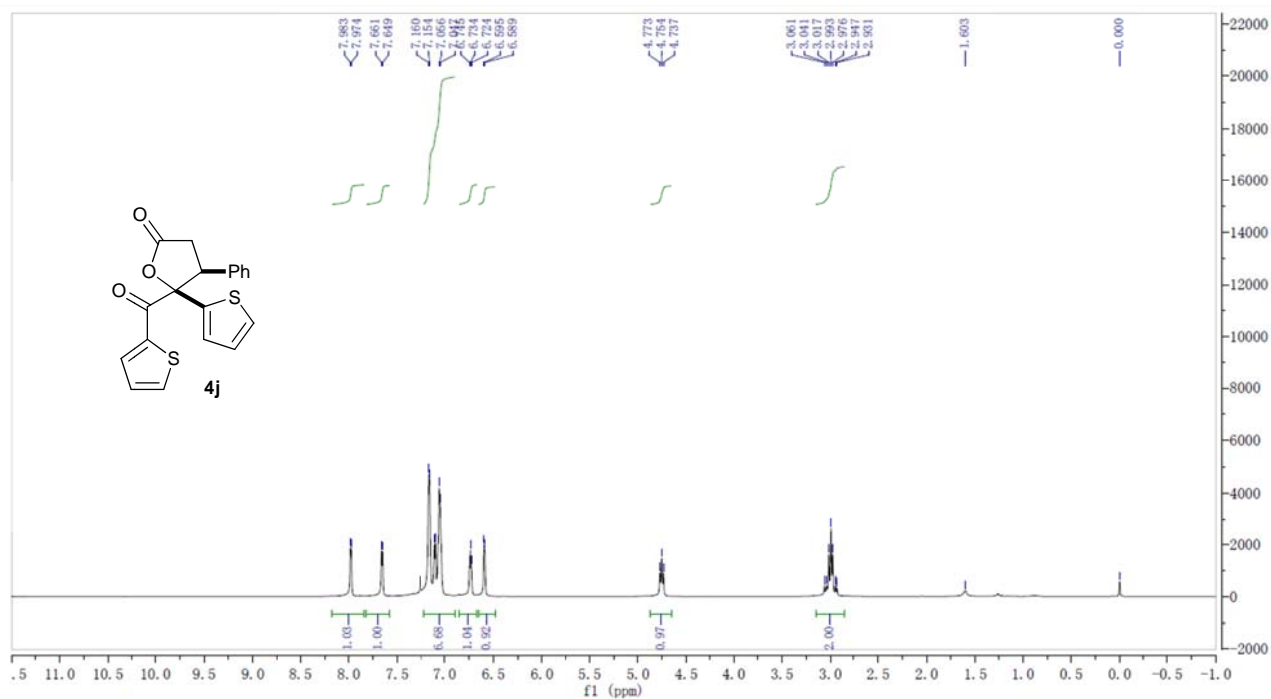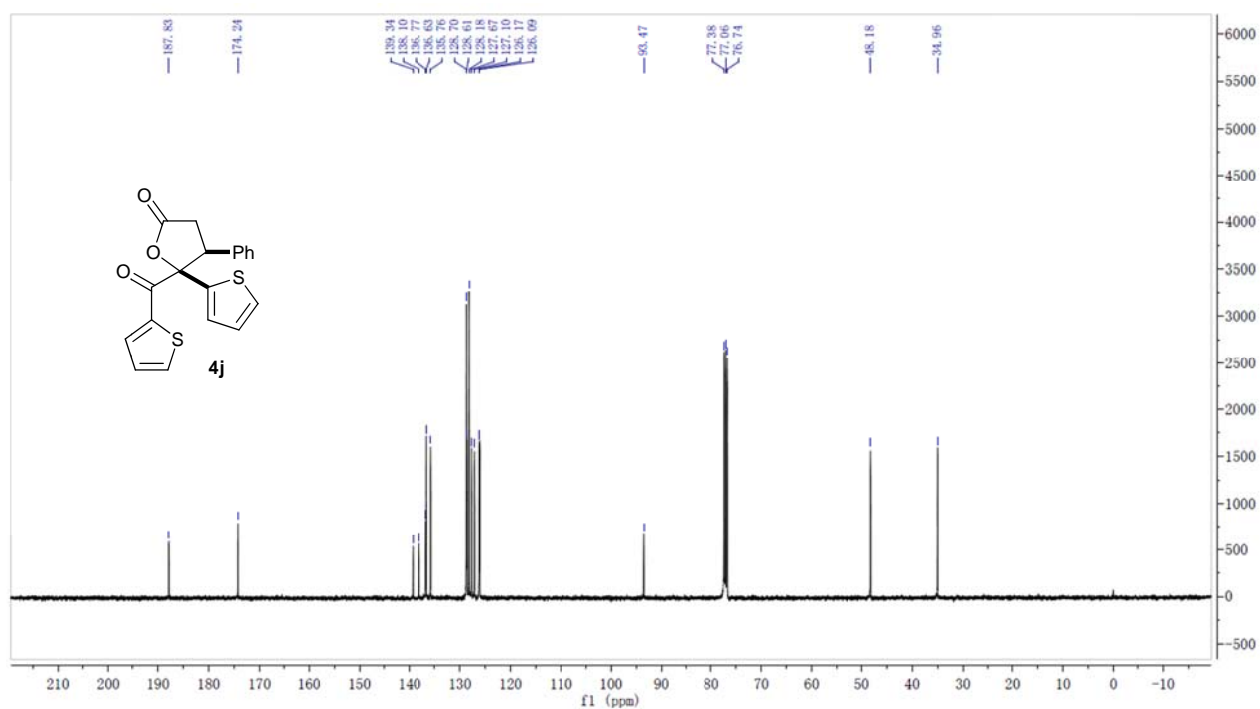

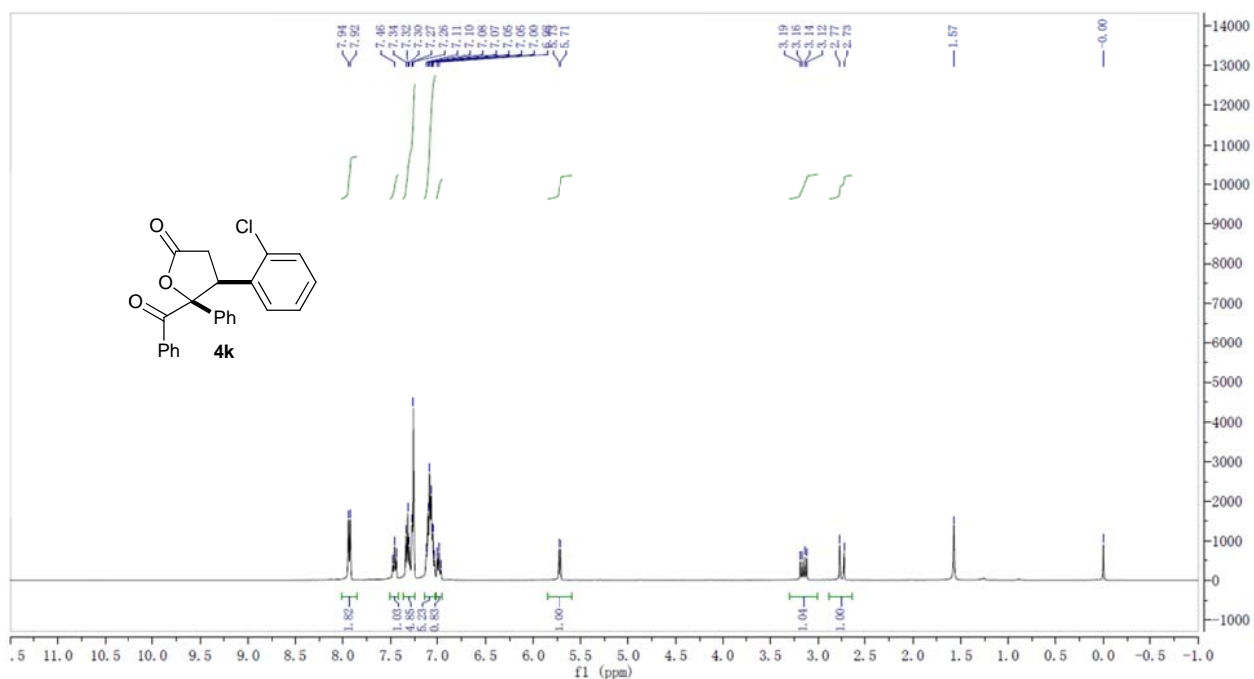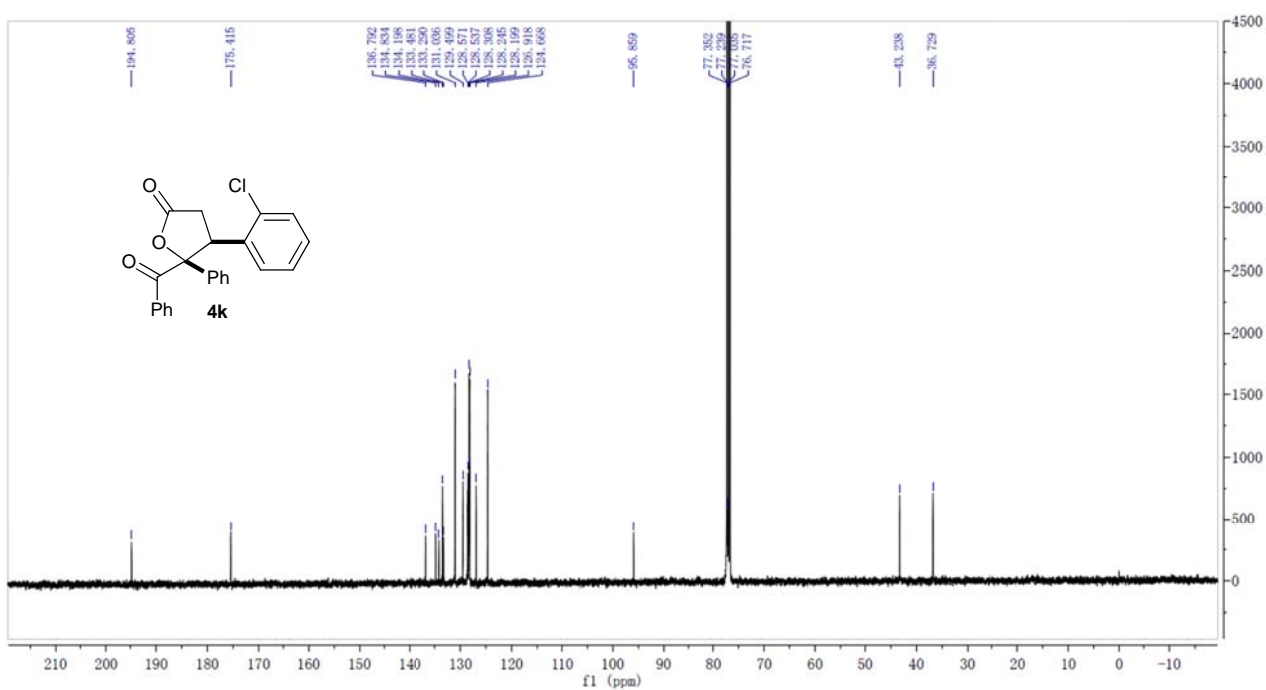

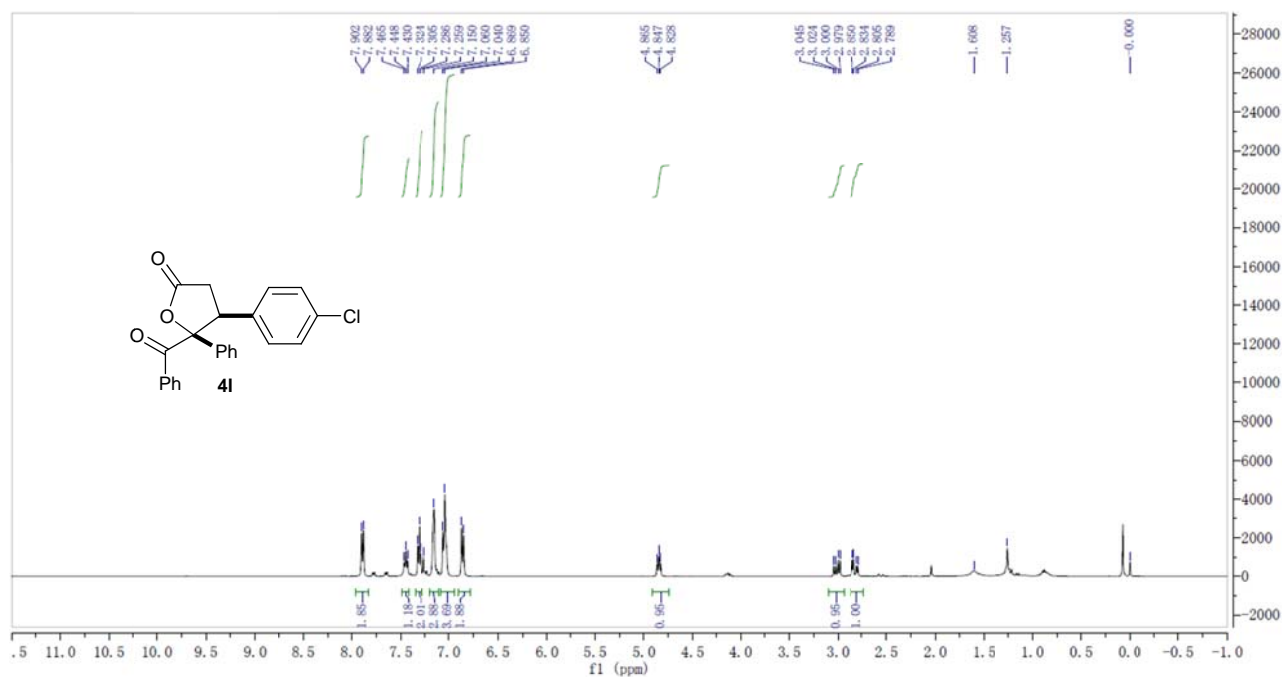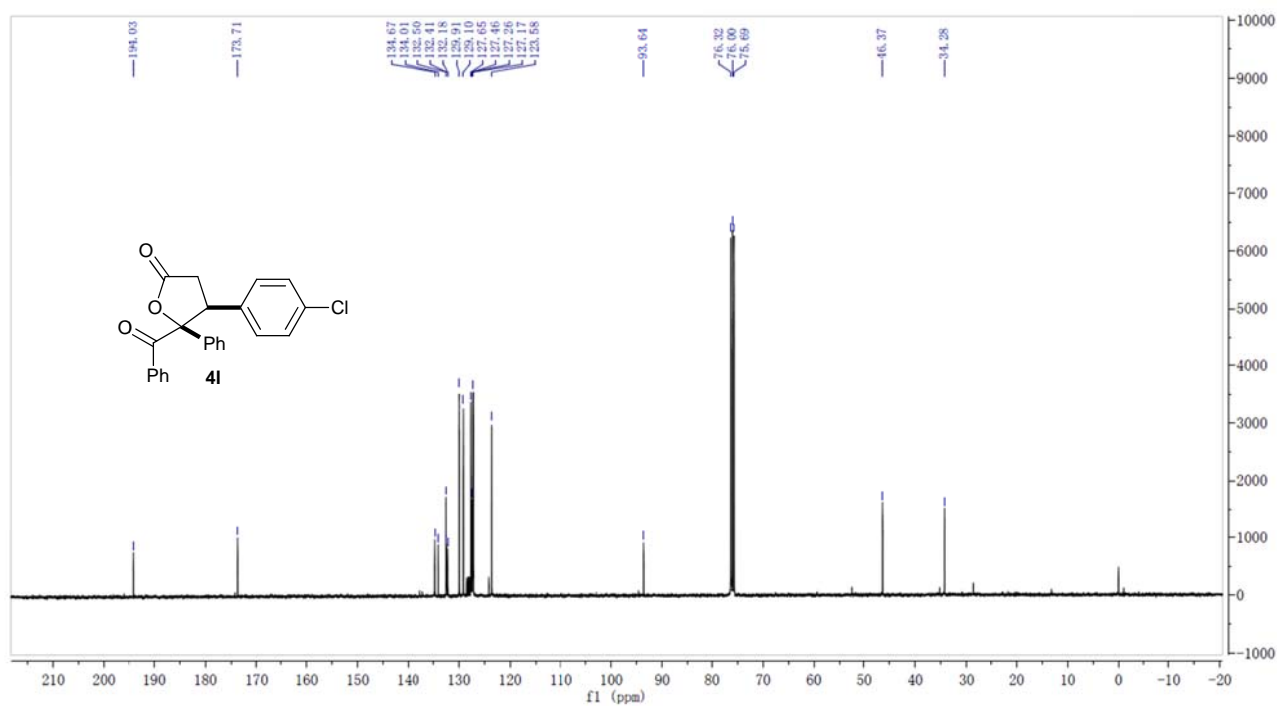

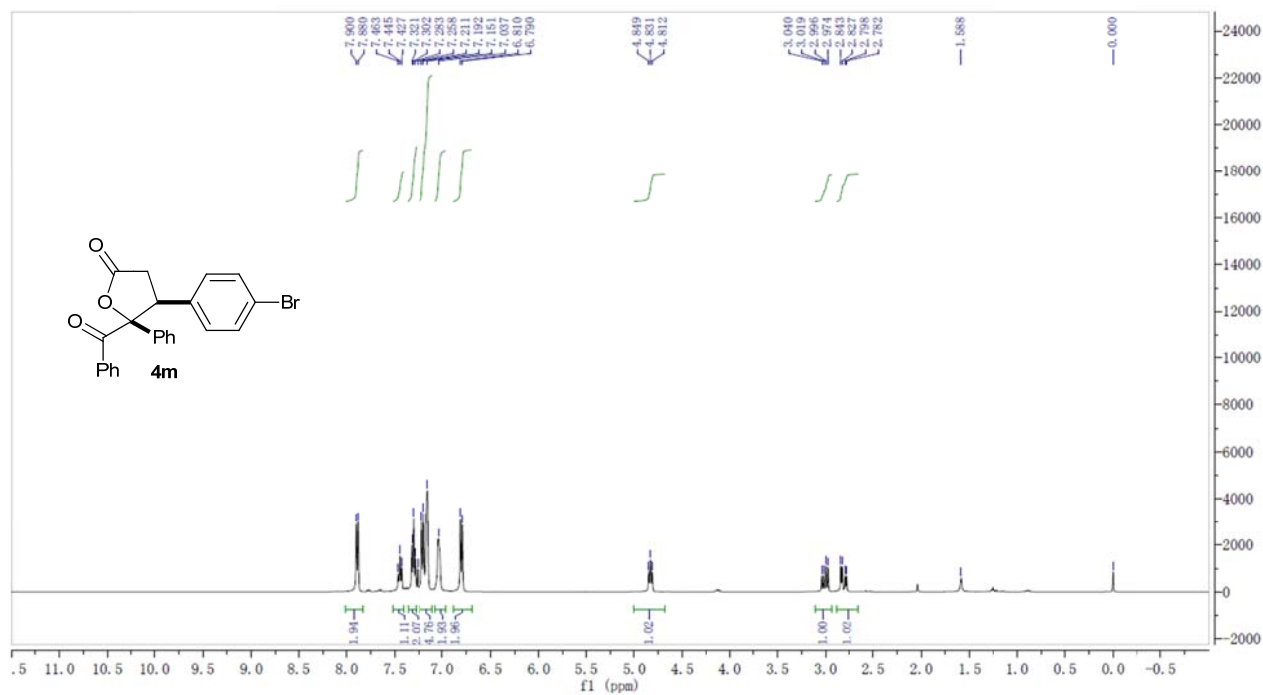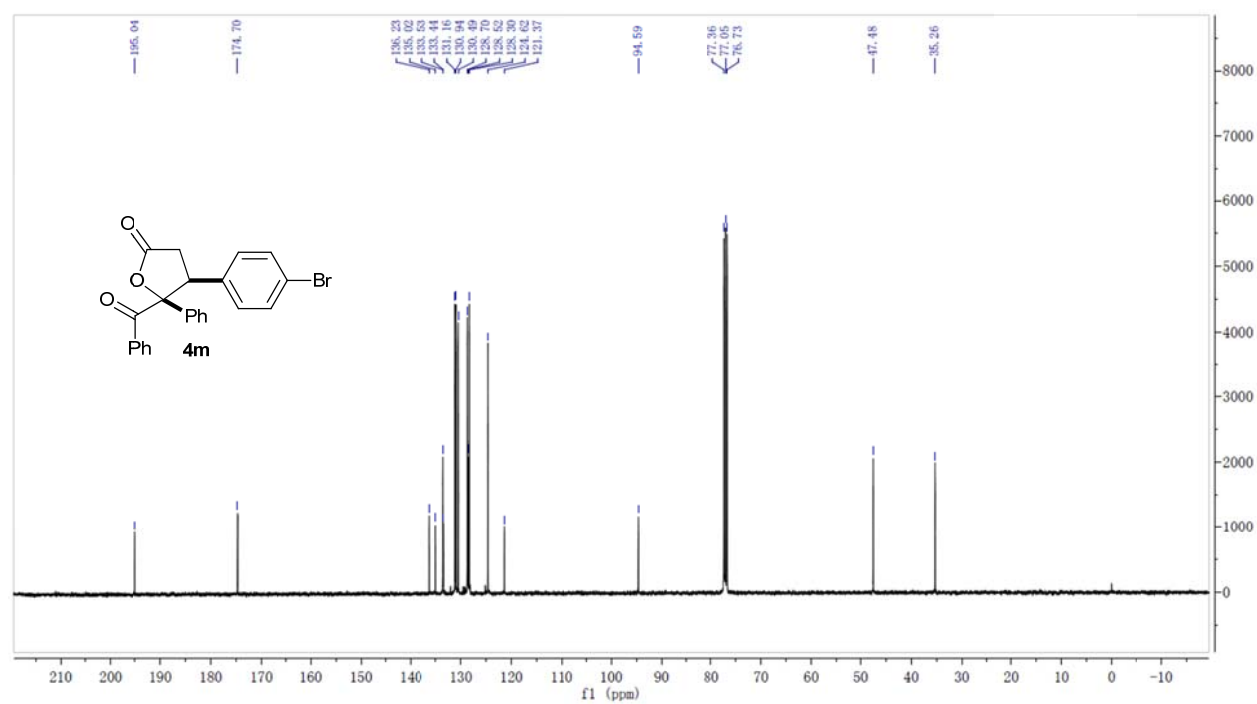

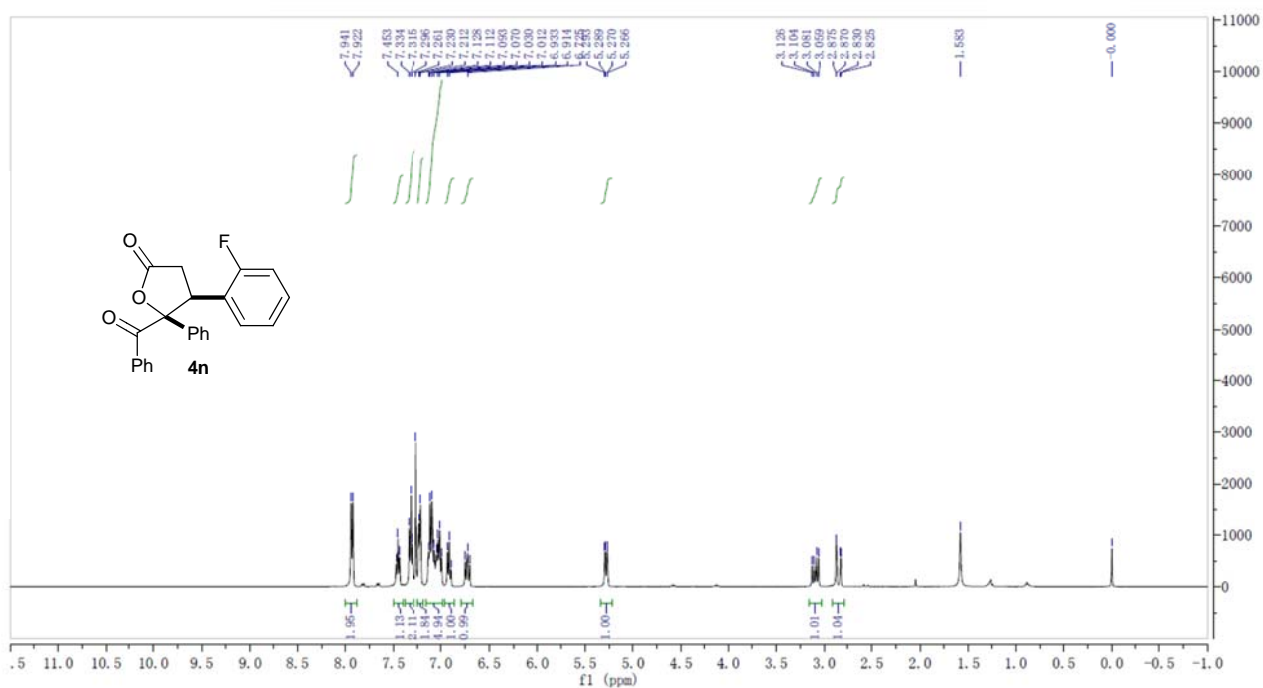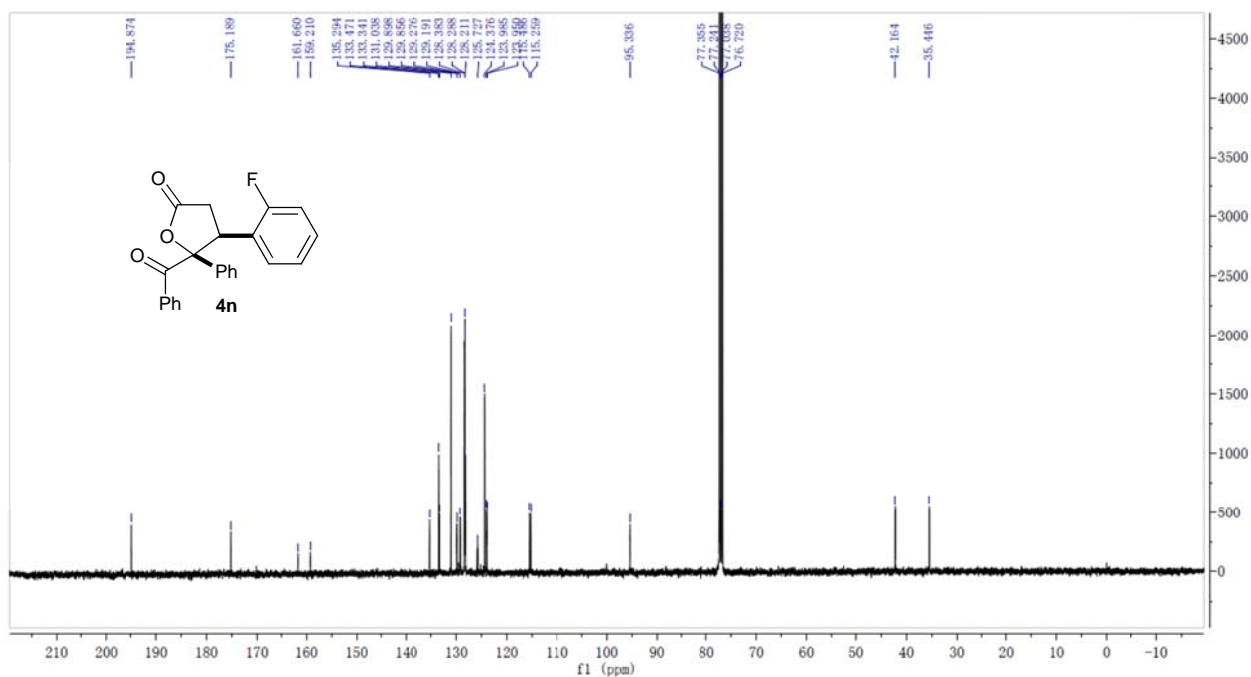





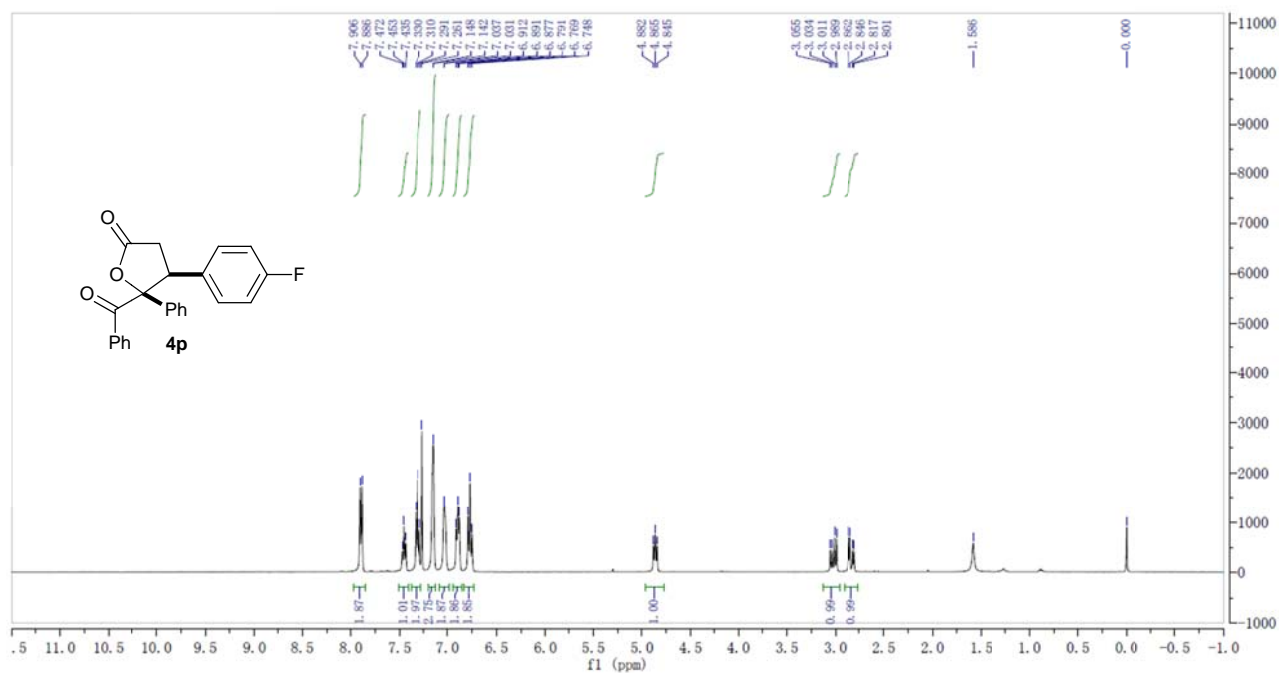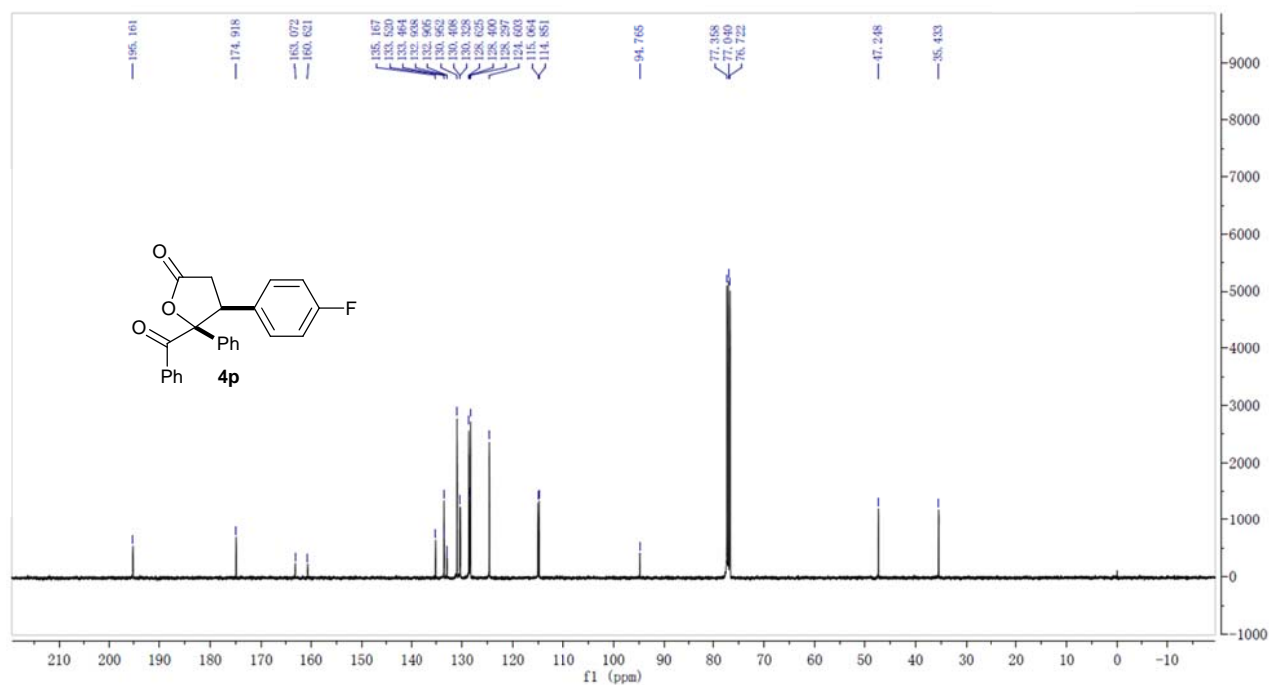

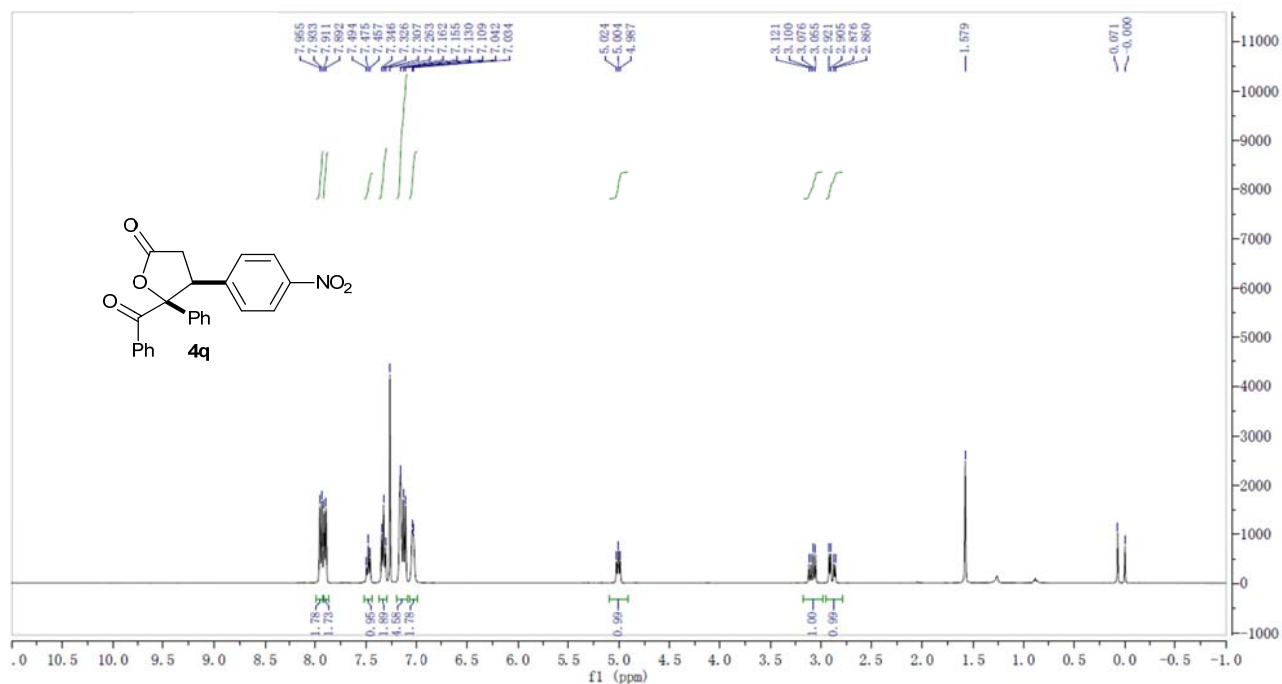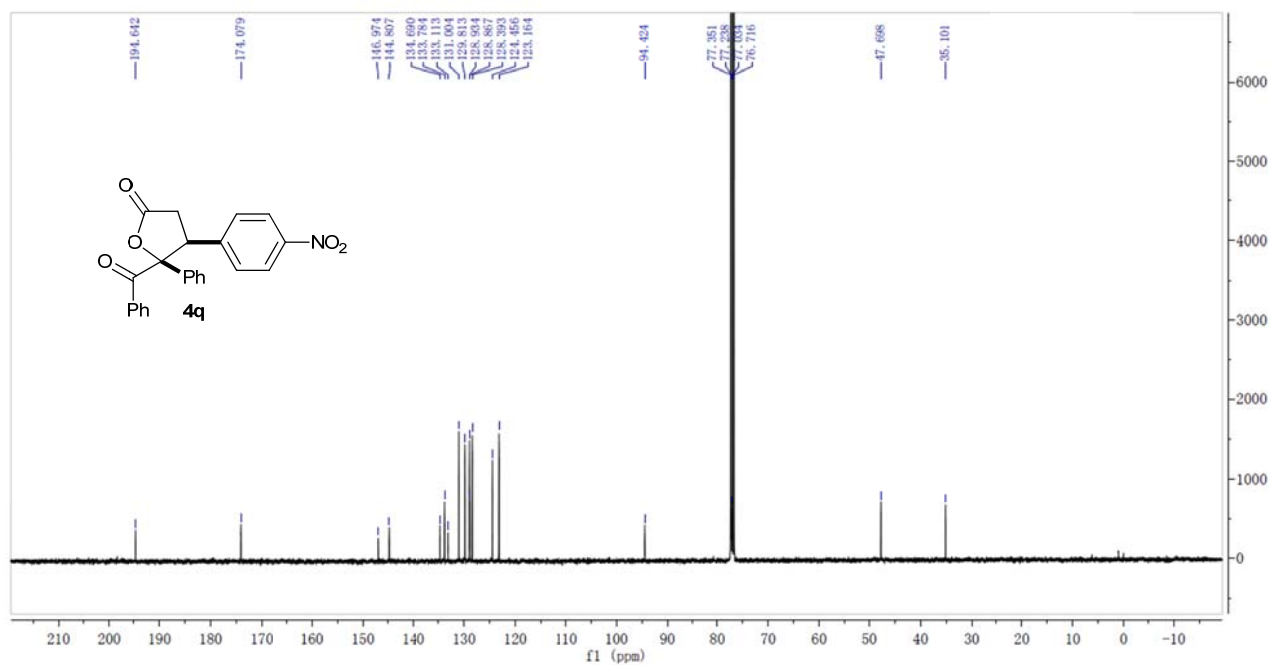

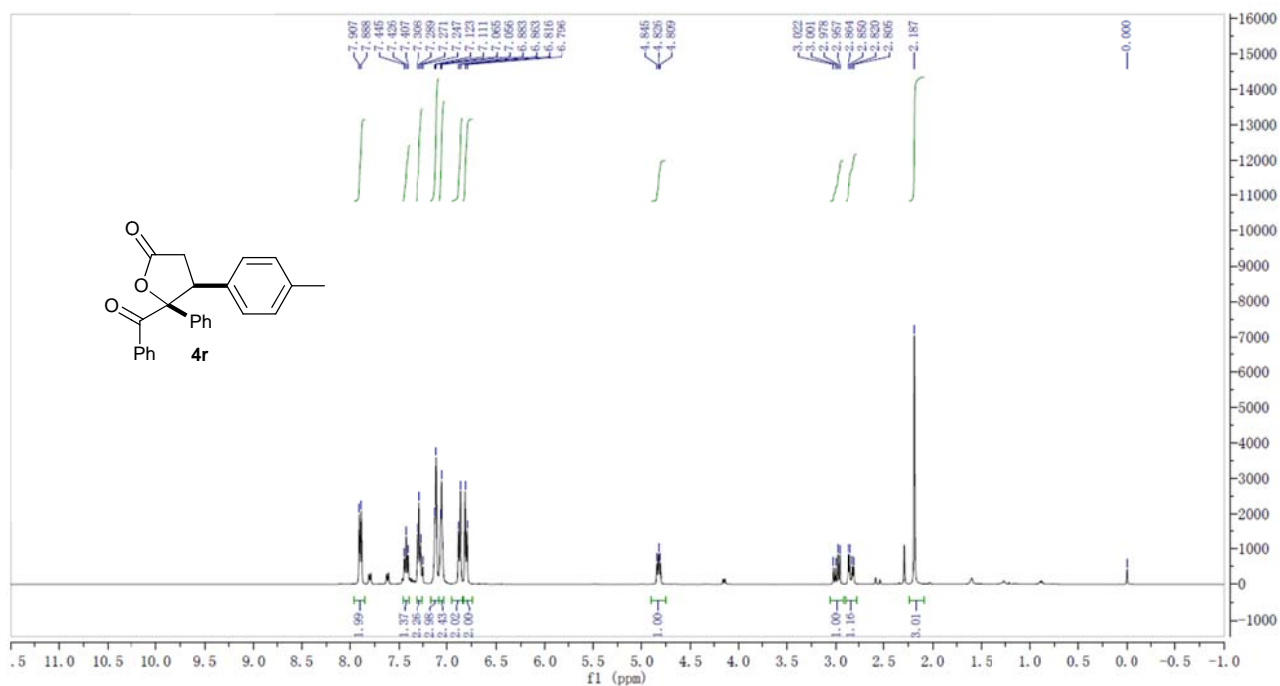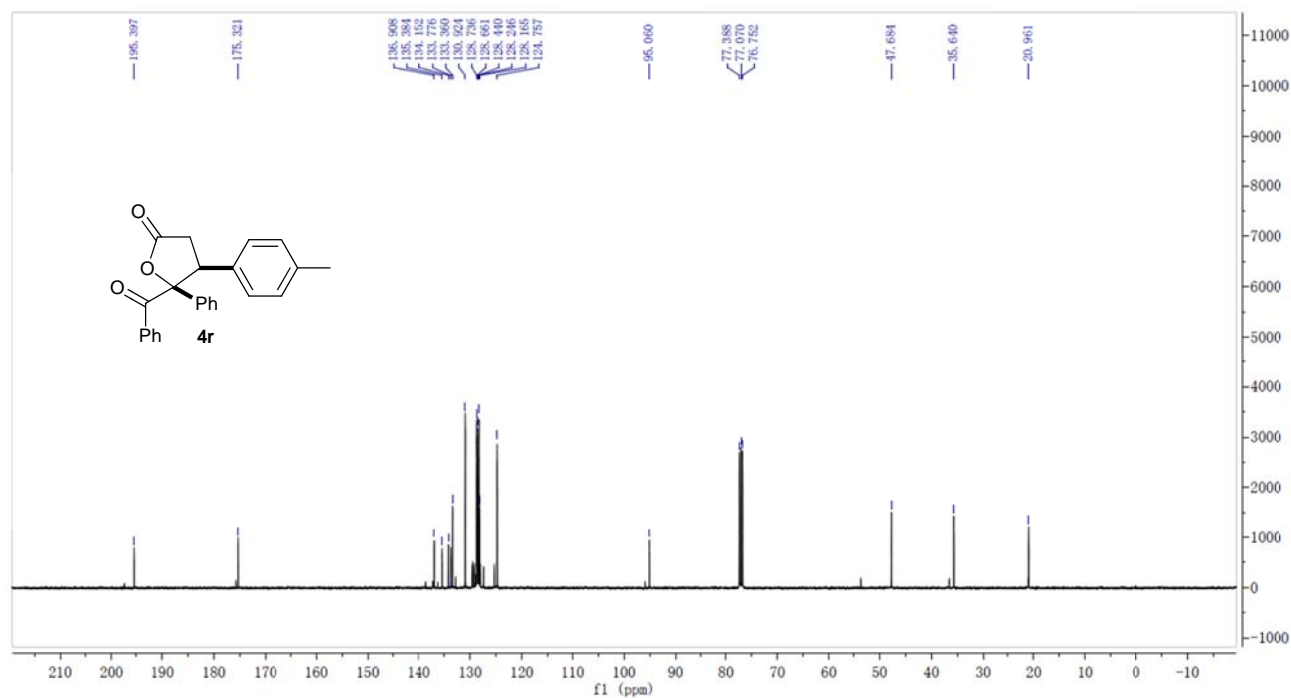

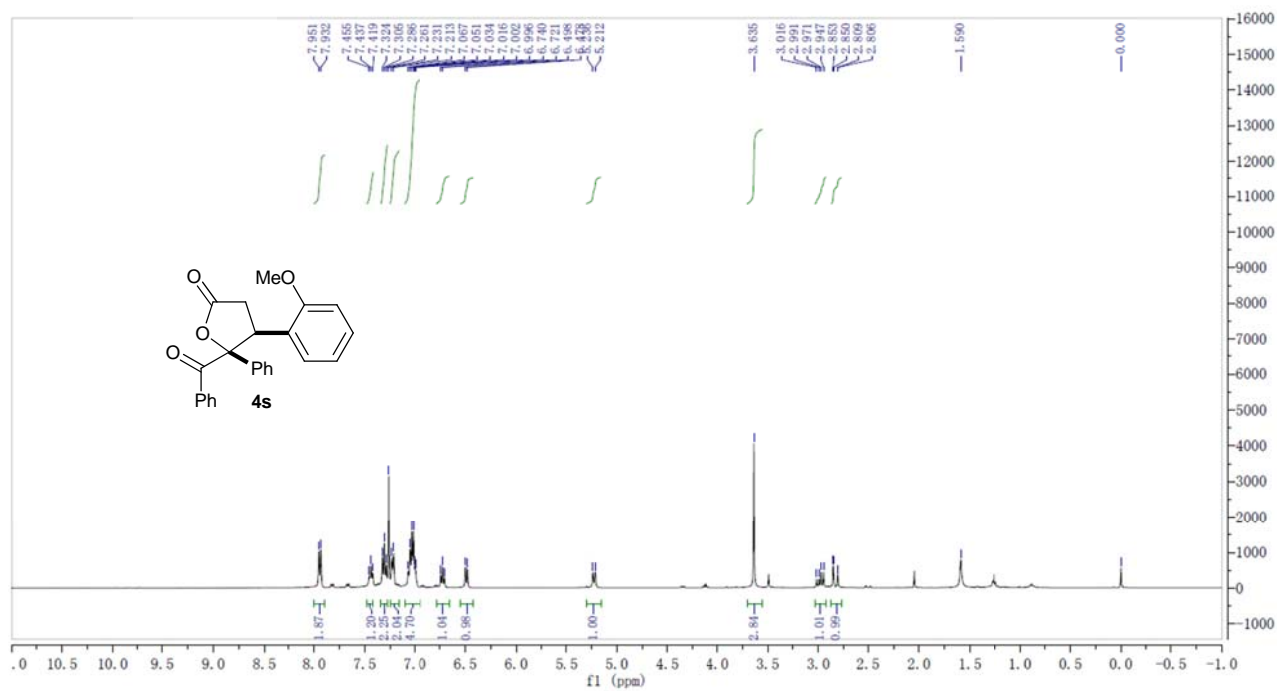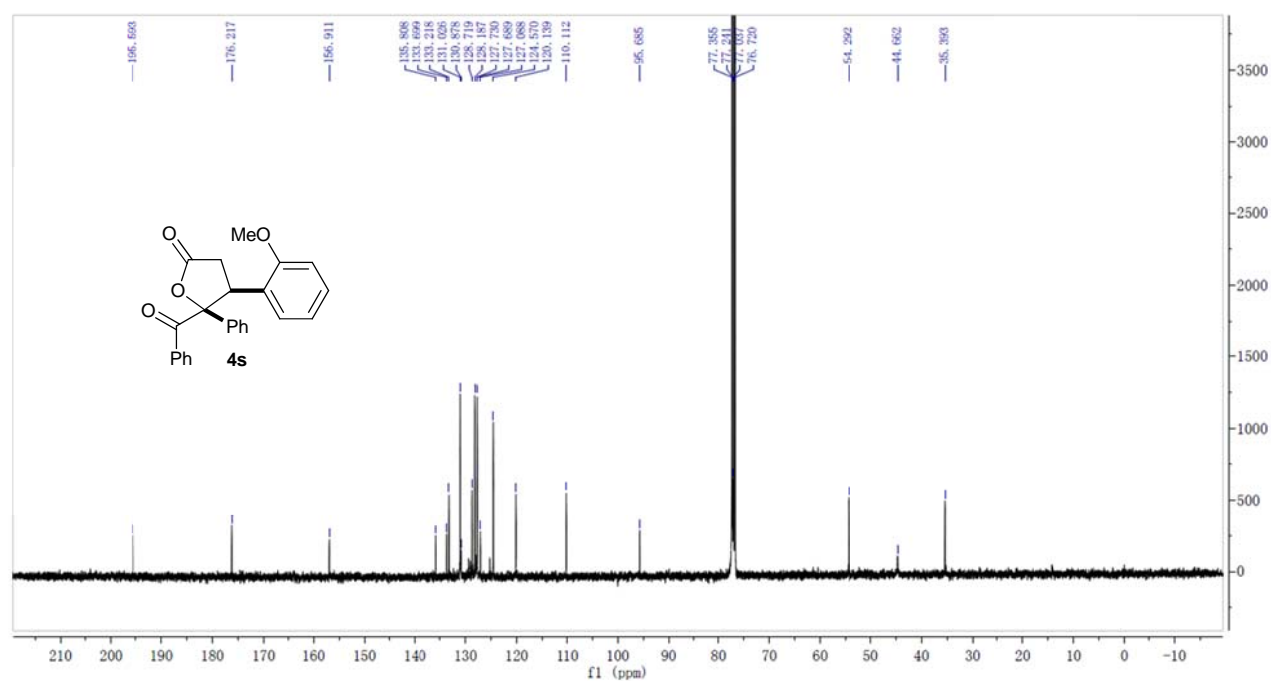

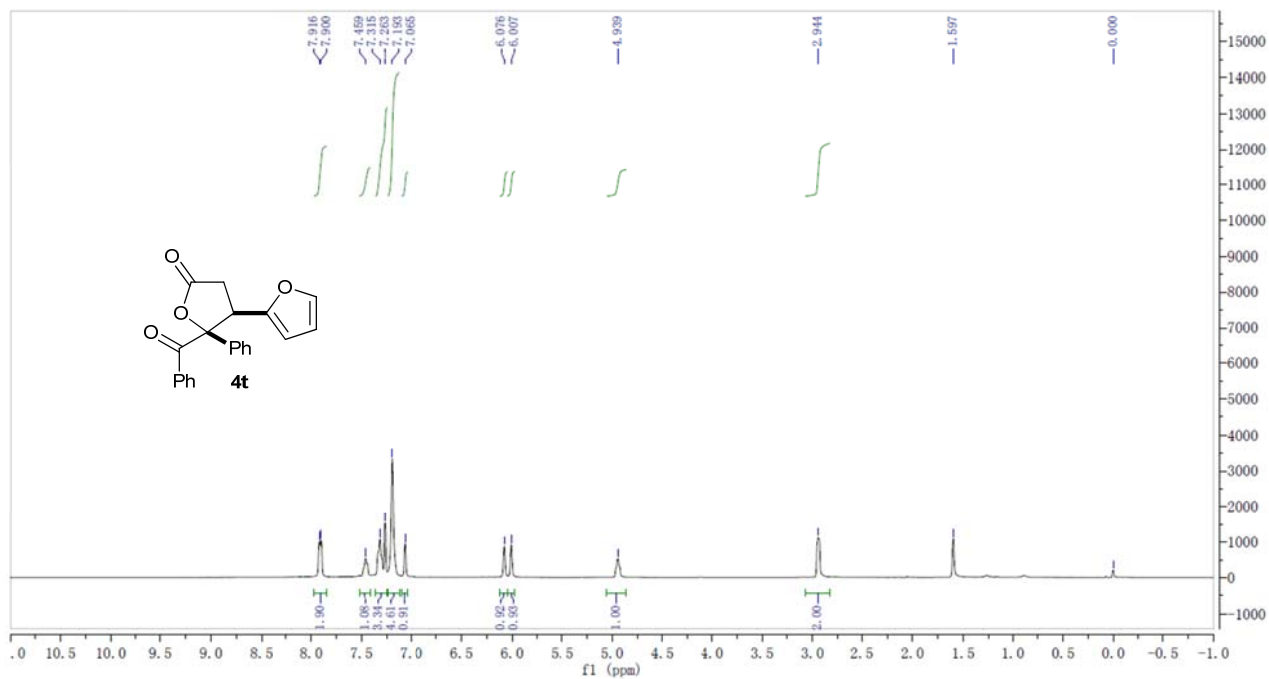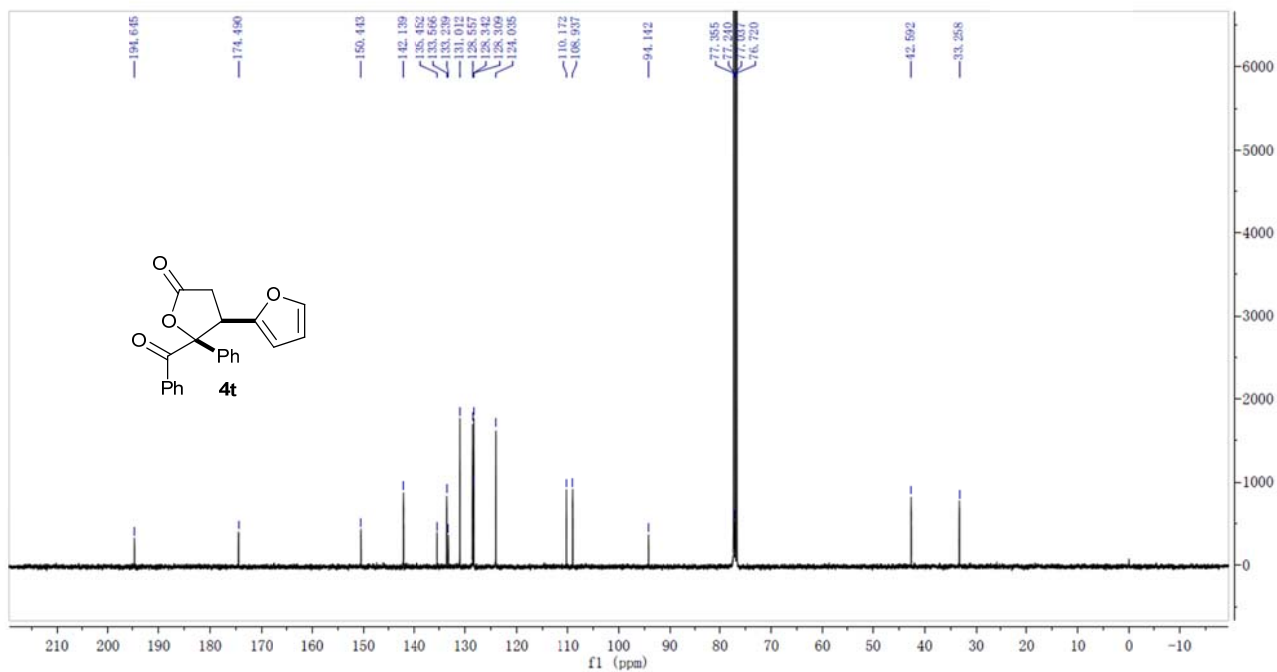

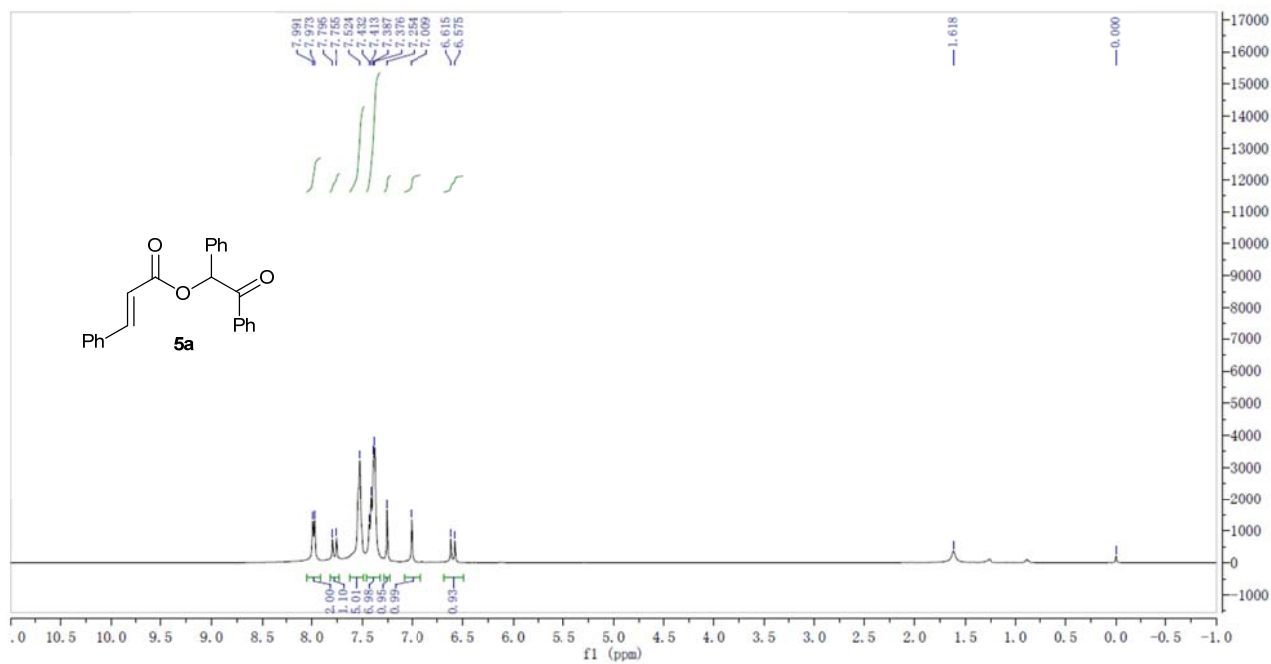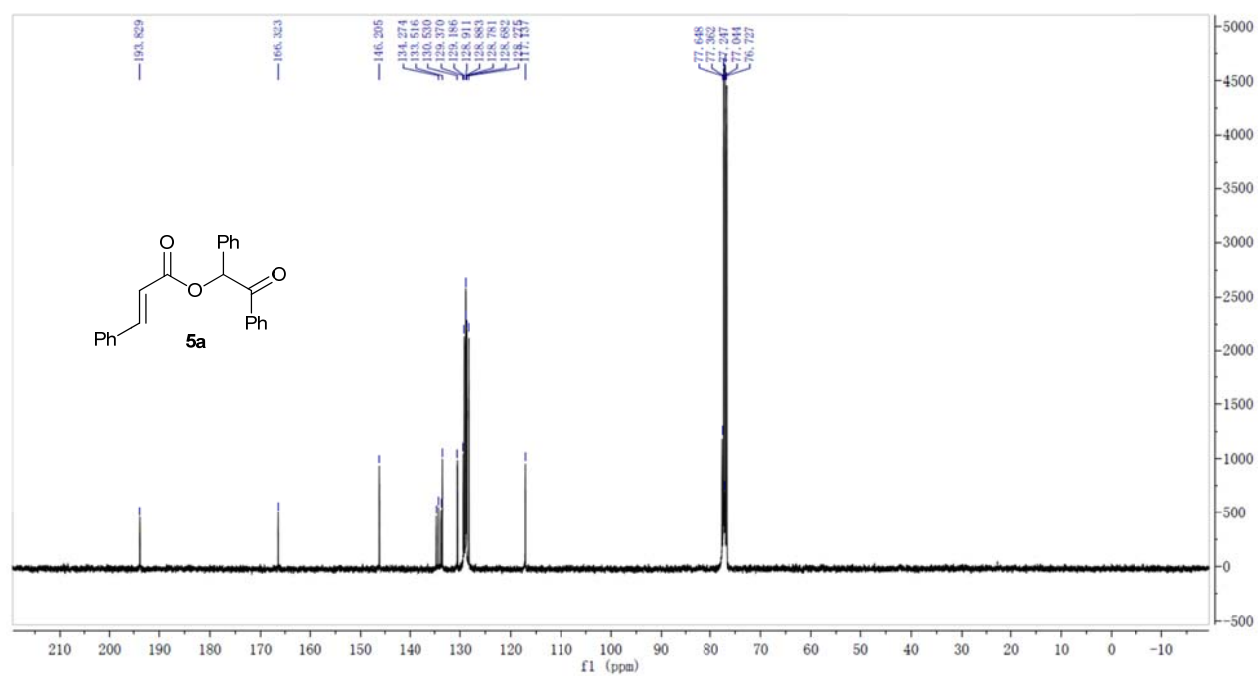

Supplement: c5ra01254f1.pdf [file c5ra01254f1.pdf]
